# Supplementary material for: Coleman free aero-elastic stability methods for three- and two-bladed floating wind turbines
Source: Copernicus journal article supplement (doi:10.5194/wes-2024-136), 2024-11-07
Supplement: Supplementary file [file wes-2024-136-AC2-supplement.pdf]

# Coleman free aero-elastic stability methods for three- and two-bladed floating wind turbines

Bogdan Pamfil<sup>1</sup>, Henrik Bredmose<sup>1</sup>, and Taeseong Kim<sup>1</sup>

<sup>1</sup>DTU Wind and Energy Systems, Koppels Allé, Building 403, DK-2800 Kgs. Lyngby, Denmark

**Correspondence:** Bogdan Pamfil (bopa@dtu.dk)

**Abstract.** An accurate prediction of aerodynamic damping is important for floating wind turbines, which can enter into resonant low frequency motion. The Coleman transform is not directly valid for the stability analysis of two-bladed floating wind turbines without requiring to apply an additional method to eliminate the system's periodicity. Therefore, we here pursue methods that do not rely on it. We derive a time domain model that takes into account the dynamic stall phenomenon and which is used for developing Coleman free aero-elastic stability analysis methods which can quantify the damping without actual simulation. It contains four structural degrees of freedom, namely the floater's pitch angle and the blade deflection amplitudes, as well as three dynamic stall aerodynamic degrees of freedom, one for each blade. The time domain model is linearized by considering part of the aerodynamic forcing as an added damping contribution. The linearized model is then made time independent through the application of Hill's or Floquet's method. This enables the possibility to carry out a stability analysis where the eigenvalues results obtained with both methods are compared. A first modal analysis serves to demonstrate the influence of aerodynamic damping through the variation of the dynamic stall time constant. Thereafter, a second modal analysis is reported as a Campbell diagram also for cross-comparison of the Hill- and Floquet- based results. Moreover, the blade degrees of freedom are converted from the rotational basis to the non-rotational one using the Coleman transform so that results in both frames can further be cross-validated. Finally, we apply the validated stability methods to a two-bladed floating wind turbine and demonstrate their functionality. The stability analysis for the two-bladed wind turbine yields new insight into the blade modal damping and is discussed with comparison to the three-bladed analysis.

## 1 Introduction

Expanding offshore wind power beyond the usual water depth limit of 50 to 70 meters will unlock up to 10 times more energy potential, positioning it as a worldwide source of clean energy (Stiesdal Offshore, 2023). Floating wind turbines have been developed since the Hywind demonstrator from 2009 with the intent to extract energy in deeper waters and they are estimated to be capable of being installed in depths reaching up to 1000 meters (CORROSION, 2023). This endeavour pushes the development of floating wind turbines for the ScotWind and INTOG (Innovation and Targeted Oil and Gas) projects in Scotland to deliver by 2035 a cumulative capacity of 24.7 GW in floating wind energy (Offshore Wind Scotland, 2024). The design of floating wind turbines relies heavily on aeroelastic modeling of the system response. For a dynamic model described in the time domain, the rotation of the rotor introduces multiple periodic terms in the governing equations that are

based on physical effects. Due to the system's periodicity, a standard eigenvalue analysis through a constant system matrix is not possible. The aero-elastic stability analysis is an important calculation for the design of wind turbines that addresses the damping of the structural modes as well as the aerodynamic damping contribution. This damping is of large importance for the low-frequency pitch motion of floating wind turbines. Usually the aero-elastic stability analysis is carried out with a linearized version of the turbine dynamic model by applying a Coleman transform (Coleman et al., 1957) which eliminates the system's periodicity. The Coleman transform, also referred to as the multi-blade coordinate (MBC) transform, is only applicable for a rotor containing three blades or more and for isotropic systems. Theoretically, the conditions to be fulfilled for a rotor to be viewed as isotropic is not to be subjected to gravity effects, to a skewed or sheared inflow, and to not have a tilt angle either. For floating wind turbines the aero-elastic stability analysis is further complicated due to the presence of the floater's degree of freedom which introduces low frequency modes. For this reason, there is a need to establish aero-elastic stability methods that are valid for floating and two-bladed wind turbines and that do not rely on the Coleman transform.

Certain past investigations on methods that render a system to become Linear Time Invariant (LTI) have been proven to be less efficient and more computationally expensive to put into practice compared to other more novel methods, or even the Coleman approach. For example, it has been proposed by Bir (2008) to use an averaged system matrix over a period as an alternative to computing the system matrix at certain sampled times steps, but that method does not take into consideration accurately the full periodicity of the system. As a remedy to this problem for the treatment of the system's periodicity, the Hill (1886) determinant method has been employed by Hansen (2016) for the modal analyses of an onshore two-bladed and three-bladed wind turbine. Alternatively, the Coleman transform is applied both in the aero-hydro-servo-elastic OpenFAST code (Bortolotti et al., 2024) and in the aero-servo-elastic HAWCStab2 code (Hansen, 2004; Kim et al., 2013; Madsen et al., 2020). As another alternative, in their respective works, Bottasso and Cacciola (2015) and Riva (2017) employed the Floquet (1883) theory to eliminate completely the periodicity so that the stability of a simplified onshore three-bladed wind turbine could be assessed. Similarly, more recently Meng et al. (2024) researched the impact of aerodynamic states on the stability analysis, by applying the Coleman transform to directly eliminate the periodicity of a floating wind turbine, followed by a modal order reduction. With a similar main scope in mind, in our past work the linearization of a floating wind turbine's simplified equations of motion has been already realized (Pamfil et al., 2024) by relying on Hill's method, but without taking into account all kinematic effects that influence the blade motion nor having implemented yet a dynamic stall model.

The purpose of the present study is to compare and validate Hill's and Floquet's methods for the stability analysis of a floating wind turbine. In this context we aim to clarify four objectives stated as questions: 1) how the effect of the floater tilt is involved in the stability analysis, 2) if the damping effects of the aerodynamic states can be consistently included, 3) if the results of the two methods agree and can reproduce the forward and backward whirling rotor modes in a Coleman-based analysis, and 4) if the methods can successfully be applied to a two-bladed floating wind turbine. Hence, to answer these questions, we derive a simplified floating wind turbine model which has four structural degrees of freedom (DOFs), being the three blades deflection amplitudes and a platform pitch angle. This time domain model is then enhanced by including Øye's linearized dynamic stall model (Øye, 1991) through the consideration of an extra dynamic stall aerodynamic degree of freedom per blade. The dynamic stall simulations are used as a benchmark for comparison between the time domain model

and a linear model which is assembled by a full linearization of the aerodynamic damping load. After it is assessed if the linear model is assembled correctly and if it is physically consistent, we render it to be linear time invariant (LTI) by applying Hill's or Floquet's method in order to be exempt from having to apply the Coleman transform. By relying on either method, we conduct a first set of stability analyses for a varying dynamic stall model time constant intensity and a second set of studies for a variation of the rotational speed and displayed as Campbell diagrams. Regarding the applicability of Hill's and Floquet's method on the system matrix, the resulting eigenvalues are compared with the ones found through the Coleman transform by reconstructing the rotor forward whirling (FW) and backward whirling (BW) modes. The results of these analyses are further verified through a cross-validation of the eigenvalues for a two-bladed floating wind turbine model.

We achieve the first objective about finding the impact of the floater tilt on the stability analysis by showing that the Equations of Motion (EOMs) do not depend on the equilibrium floater tilt position when neglecting gravity effects. This implies that the equilibrium floater tilt position does not affect the stability analysis. Secondly, aerodynamic states are included in the linear model's state-space system and they do affect the modal damping and natural frequencies as showcased through stability analyses results. The third objective is fulfilled by proving first that either Hill's and Floquet's stability method is able to capture the correct principal eigenfrequencies in the original frame which is called rotational frame. It is also proved that these eigenvalues can be expressed in a modified frame called the non-rotational frame to match with the ones found through the Coleman transformed system matrix. On that matter, the LTI model derived with Hill's method takes fully into consideration the periodicity of the system, making it possible to calculate the principal natural frequencies and the periodically shifted frequencies. Conversely, the LTI model found with Floquet's method is characterized only by the principal modes. The fourth and last objective is fulfilled by developing the two-bladed wind turbine model and revealing that the same methods as for a three-bladed rotor can be applied to obtain correct stability results. We also observe a marked difference in blade modal damping behaviour for the two-bladed floating wind turbine compared to the three-bladed case.

## 2 Floating wind turbine model description

The floating wind turbine model that is being studied has four structural degrees of freedom (DOFs) as schematized in Figure 1. For a three-bladed wind turbine, the four structural DOFs are the blades flap-wise deflection amplitudes labeled as  $a_l$  with a blade identification index of  $l = 1, 2, 3$ , and the floater pitch angular motion labeled as  $\xi_5$ . These four structural DOFs are represented in a vector form as  $\underline{x} = [\xi_5, a_1, a_2, a_3]^T$ . Three additional aerodynamic DOFs are included later to account for the dynamic stall phenomenon. The floating wind turbine blades structural properties, such as its blade mode shapes  $\phi$ , natural frequencies  $\omega$ , and the blade mass per unit length  $m(r)$ , are taken from the DTU 10-MW reference wind turbine (Bak et al., 2013). In Figure 1,  $d$  identifies a reference radial position from the hub along the blade of length  $L_{blade}$  with  $d = 0.7L_{blade}$ , i.e. at 70 % of the blade length span. For simplicity, the aerodynamic force for each blade  $F_{l,aero}$  is calculated at that reference distance  $r = d$  from the blade root which is representative of the full blade in terms of applied aerodynamic loads. The floating wind turbine is subjected to an inflow velocity  $V_0$  at hub height  $H$ , to a forcing moment  $M_F$  applied at the floater base, and

to a constant rotor rotational speed of  $\Omega$ . Here,  $K_{\xi_5}$  refers to the rotational torsion stiffness coefficient along the floater pitch angle  $\xi_5$  and  $M$  is the cumulative mass of the hub and nacelle combined.

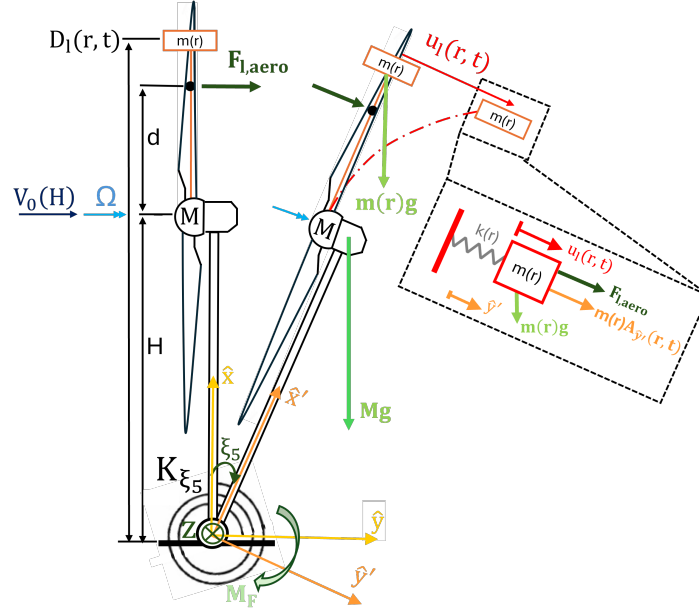

**Figure 1.** Schematic representation of the four structural DOFs floating wind turbine model where  $m(r)$  is the blade's mass distribution at the radial location  $r$ ,  $u_l(r, t)$  is the blade deflection, and the index  $l$  refers to the blade identification.

95 The blade deflection  $u_l(r, t)$  is approximated through the consideration of the first flap mode (1f) only which is characterized by a mode shape  $\phi_{1f}$  and a natural frequency  $\omega_{1f}$ , resulting in  $u_l(r, t) = \phi_{1f}(r)a_l(t)$ .

Further, the time ( $t$ ) dependant azimuthal angular position  $\Psi_l$  of the blades is defined in radians as

$$\Psi_l(t) = \frac{2\pi}{N_b}(l-1) + \Omega t, \quad (1)$$

100 where  $N_b$  is the rotor's number of blades and the rotational speed  $\Omega$  is connected to a corresponding period  $T$  through the ratio of  $T = 2\pi/\Omega$ .

In Figure 1, a global fixed coordinate system is defined in terms of unit vectors  $\hat{x}$  and  $\hat{y}$ . Additionally, there is a local moving coordinate system that rotates with the blade and describes the position of a blade section of mass  $m(r)$ . That coordinate system defines the radial location of mass  $m(r)$  with the unit vector  $\hat{x}'(t)$  and its tangential motion as the blade is deflected in the direction of unit vector  $\hat{y}'(t)$ . Based on the perpendicularity of these unit vectors, an out of plane vector  $\hat{z}$  is the result of a cross product between them, such that  $\hat{z} = \hat{x}' \times \hat{y}'$  and  $-\hat{z} = \hat{y}' \times \hat{x}'$ . The radial position in the  $\hat{x}'(t)$ - $\hat{y}'(t)$  coordinate system of a blade's element mass  $m(r)$  is  $D_l(r, t) = H + r \cos \Psi_l(t)$  and its tangential displacement is the blade deflection  $u_l(r, t)$ . The vector representation of the mass  $m(r)$ 's displacement,  $\hat{D}_l(r, t)$ , in the moving rotating coordinate system  $\hat{x}'(t)$ - $\hat{y}'(t)$  is thus

$$\hat{D}_l(r, t) = D_l(r, t)\hat{x}'(t) + u_l(r, t)\hat{y}'(t). \quad (2)$$

As mentioned earlier, the blade deflection  $u_l(r, t)$  is quantified by the product of the first flap mode shape  $\phi_{1f}(r)$  in the direction  
 110 tangential to the rotor plane with the blade displacement amplitude  $a_l(t)$ .

## 2.1 Equations of Motion

A time domain model is developed with the initial purpose of obtaining the steady states responses for a given operational point. It serves also as a foundation to linearize afterwards the aerodynamically damped forcing as a damping matrix contribution and to include the linear dynamic stall DOFs equations in the system matrices. As a starting point, it is observable in Figure  
 115 1 that the unit vectors  $\hat{x}'$  and  $\hat{y}'$  can be represented using the global fixed coordinates  $\hat{x}$  and  $\hat{y}$  after applying a rotation transformation, respectively as  $\hat{x}' = \cos(\xi_5)\hat{x} + \sin(\xi_5)\hat{y}$  and  $\hat{y}' = -\sin(\xi_5)\hat{x} + \cos(\xi_5)\hat{y}$ . They are then derived in time to obtain  $\dot{\hat{x}}' = \dot{\xi}_5\hat{y}'$  and  $\dot{\hat{y}}' = -\dot{\xi}_5\hat{x}'$ . These expressions come in handy when deriving for the mass  $m(r)$  element its velocity vector  $\hat{V}_l(r, t) = d(\hat{D}_l(r, t))/dt$ ,

$$\hat{V}_l(r, t) = \dot{D}_l(t)\hat{x}' + D_l(r, t)\dot{\hat{x}}'(t) + \dot{u}_l(r, t)\hat{y}'(t) + u_l(r, t)\dot{\hat{y}}'(t) = \left(\dot{D}_l(r, t) - u_l(r, t)\dot{\xi}_5\right)\hat{x}' + \left(D_l(r, t)\dot{\xi}_5 + \dot{u}_l(r, t)\right)\hat{y}', \quad (3)$$

120 and acceleration vector  $\hat{A}_l(r, t) = d(\hat{V}_l(r, t))/dt$ ,

$$\hat{A}_l(r, t) = \left(\ddot{D}_l(r, t) - u_l(r, t)\ddot{\xi}_5 - 2\dot{u}_l(r, t)\dot{\xi}_5 - D_l(r, t)\dot{\xi}_5^2\right)\hat{x}' + \left(2\dot{D}_l(r, t)\dot{\xi}_5 + D_l(r, t)\ddot{\xi}_5 + \ddot{u}_l(r, t) - u_l(r, t)\dot{\xi}_5^2\right)\hat{y}'. \quad (4)$$

The acceleration vector  $\hat{A}_l(r, t)$  can then be linearized by disregarding higher order terms, which results in:

$$\hat{A}_l(r, t) \approx \hat{A}_{l,lin}(r, t) = \underbrace{\ddot{D}_l(r, t)}_{A_{\hat{x}',l}}\hat{x}' + \underbrace{\left(2\dot{D}_l(r, t)\dot{\xi}_5 + D_l(r, t)\ddot{\xi}_5 + \ddot{u}_l(r, t)\right)}_{A_{\hat{y}',l}}\hat{y}'. \quad (5)$$

We observe in Eqs. (3) and (4) that none of the nonlinear terms include  $\xi_5$  as a factor. For this reason the linearized model  
 125 is applicable for any steady state value of  $\xi_5$ . Finally, we identify in Eq. (5) the tangential acceleration  $A_{\hat{y}',l}$  that is relevant to describe the element mass  $m(r)$ 's inertial force  $f_{\hat{y}',l}(r, t) = m(r)A_{\hat{y}',l}(r, t)$ . To build up the EOM for the linearized total moment applied around the  $\hat{z}$  axis, the angular momentum theory is used to compute the inertia moment  $p_l(r, t)$  which translates to:

$$p_l(r, t) = \frac{d}{dt} \left( \hat{D}_l(r, t) \times \left( m(r)\hat{V}_l(r, t) \right) \right). \quad (6)$$

130 The inertia moment  $p_l(r, t)$  is then approximated as  $p_{l,lin}(r, t)$  by neglecting higher order terms, which gives:

$$p_l(r, t) \approx p_{l,lin}(r, t) = m(r) \left( D_l^2(r, t)\ddot{\xi}_5 + 2D_l(r, t)\dot{D}_l(r, t)\dot{\xi}_5 + D_l(r, t)\ddot{u}_l(r, t) - \dot{D}_l(r, t)u_l(r, t) \right). \quad (7)$$

These kinematic formulas can be used to establish the equations of rotational motion around the  $\hat{z}$  axis, and of the translation  
 motion along the  $\hat{y}'$  axis which corresponds to the tangential direction of the blade rotation around the floater base. The inertia contribution of the hub and nacelle cumulative mass  $M$  is translated from the hub height to the floater's base point with a  
 135 distance  $H$  that separates the two points,  $MH^2$ . The remaining share of the rotational inertia around the  $\hat{z}$  axis is due to the

blade's distributed mass  $m(r)$ 's effect on the inertial moment  $p_{l,lin}(r,t)$ . The rotational motion equation for moments around the  $\hat{z}$  axis is written as:

$$\hat{z} : MH^2\ddot{\xi}_5\delta\xi_5 + \sum_{l=1}^{N_b} \left( \int_0^{L_{blade}} p_{l,lin}(r,t)dr\delta\xi_5 \right) + K_{\xi_5}\xi_5\delta\xi_5 = M_F\delta\xi_5 + \underbrace{\left( \sum_{l=1}^{N_b} D_l(d,t)F_{l,aero}(t) \right)}_{M_{aero}}\delta\xi_5, \quad (8)$$

after using the principle of virtual work with a  $\delta\xi_5$  rotation. The applied forces on the right hand side of Eq. (8) include  $M_F$  which is the moment applied directly on the floater DOF  $\xi_5$ , and an aerodynamic moment  $M_{aero}$  contribution through  $F_{l,aero}$ . As seen in Figure 1, the aerodynamic moment  $M_{aero}$  is induced by an equivalent total aerodynamic forcing  $F_{l,aero}$  applied on each blade with a moment arm  $D_l(d,t) = H + d\cos\Psi_l(t)$  at the reference location of  $r = d$ . This aerodynamic forcing is an approximation to the total contribution by a local load  $F_l$  integrated over the entire blade length span as  $F_{l,aero} = F_l L_{blade}$ .

Similarly the equation of translation motion along the  $\hat{y}'$  axis for each  $l^{th}$  blade is found based on the principle of the blade displacement virtual work  $\delta u_l(r,t) = \delta a_l(t)\phi_{1f}(r)$ :

$$\hat{y}' : \int_0^{L_{blade}} \underbrace{m(r)A_{\hat{y}',l}(r,t)}_{f_{\hat{y}',l}(r,t)}\delta a_l\phi_{1f}(r)dr + \underbrace{\int_0^{L_{blade}} k(r)a_l(t)\phi_{1f}(r)(\delta a_l\phi_{1f}(r))dr}_{K_{a_l}a_l\delta a_l} = \underbrace{F_{l,aero}(t)\phi_{1f}(d)}_{GF_{a_l}}\delta a_l, \quad (9)$$

where there is a consideration of the blade aerodynamic forcing  $F_{l,aero}$  and the tangential inertia force  $f_{\hat{y}',l}(r,t)$ . In Eq. (9),  $k(r)$  is the blade sectional stiffness as  $k(r) = m(r)\omega_{1f}^2$ , and  $\phi_{1f}(d)$  is the first flap mode's value at the reference radial location  $r = d$ . The internal force which is caused by the element mass's  $m(r)$  stiffness coefficient  $k(r)$  is not appearing in Eq. (8) because it is not an external force applied to the system. The external force that is considered in Eq. (9) is the generalized aerodynamic blade force  $GF_{a_l}$ .

The right hand side for both the rotational and translation equations of motion are part of the time domain model's forcing vector noted  $\underline{F}_T$ . The time (index  $T$ ) domain model's dynamics is described by the following overall EOM,

$$\underline{\underline{M}}_S\ddot{\underline{x}} + \underline{\underline{C}}_S\dot{\underline{x}} + \underline{\underline{K}}_S\underline{x} = \underline{F}_T, \quad (10)$$

where there is only a structural (index  $S$ ) damping  $\underline{\underline{C}}_S$ .

The structural mass  $\underline{\underline{M}}_S$  and stiffness  $\underline{\underline{K}}_S$  matrices include a contribution due to the floater and overall turbine (nacelle and tower) structural properties ( $\underline{\underline{M}}_{S,floater}$  and  $\underline{\underline{K}}_{S,floater}$ ). The other contribution originates from the blades ( $\underline{\underline{M}}_{S,blades}(r)$  and  $\underline{\underline{K}}_{S,blades}(r)$ ) structural properties through an integration span-wise in direction  $r$ . Therefore, for the three-bladed wind turbine, the structural mass  $\underline{\underline{M}}_S = \underline{\underline{M}}_{S,floater} + \int_0^{L_{blade}} \underline{\underline{M}}_{S,blades}(r)dr$  and stiffness  $\underline{\underline{K}}_S = \underline{\underline{K}}_{S,floater} + \int_0^{L_{blade}} \underline{\underline{K}}_{S,blades}(r)dr$  matrices are assembled as

$$\underline{\underline{M}}_S = \begin{bmatrix} MH^2 & 0 & 0 & 0 \\ 0 & 0 & 0 & 0 \\ 0 & 0 & 0 & 0 \\ 0 & 0 & 0 & 0 \end{bmatrix} + \int_0^{L_{blade}} m(r) \begin{bmatrix} \sum_{l=1}^3 D_l^2(r,t) & D_1(r,t)\phi_{1f}(r) & D_2(r,t)\phi_{1f}(r) & D_3(r,t)\phi_{1f}(r) \\ D_1(r,t)\phi_{1f}(r) & (\phi_{1f}(r))^2 & 0 & 0 \\ D_2(r,t)\phi_{1f}(r) & 0 & (\phi_{1f}(r))^2 & 0 \\ D_3(r,t)\phi_{1f}(r) & 0 & 0 & (\phi_{1f}(r))^2 \end{bmatrix} dr, \quad (11)$$

and

$$\underline{\underline{K}}_S = \begin{bmatrix} K_{\xi_5} & 0 & 0 & 0 \\ 0 & 0 & 0 & 0 \\ 0 & 0 & 0 & 0 \\ 0 & 0 & 0 & 0 \end{bmatrix} + \int_0^{L_{blade}} m(r) \begin{bmatrix} 0 & -\ddot{D}_1(r,t)\phi_{1f}(r) & -\ddot{D}_2(r,t)\phi_{1f}(r) & -\ddot{D}_3(r,t)\phi_{1f}(r) \\ 0 & \omega_{1f}^2(\phi_{1f}(r))^2 & 0 & 0 \\ 0 & 0 & \omega_{1f}^2(\phi_{1f}(r))^2 & 0 \\ 0 & 0 & 0 & \omega_{1f}^2(\phi_{1f}(r))^2 \end{bmatrix} dr, \quad (12)$$

in accordance with the rotational and translation equations of motion in Eqs. (8) and (9). As observable in Eq. (12), the inertia moment  $p_{l,lin}(r,t)$  generates negative restoring forces that are equivalent to a negative stiffness effect. Moreover, the restoring floater pitching moment coefficient  $K_{\xi_5}$  is tuned to achieve a realistic platform pitch frequency of  $\omega_{\xi_5} = 0.035$  Hz.

The structural damping  $\underline{\underline{C}}_S$  is inspired by a classical Rayleigh damping model,  $\underline{\underline{C}}_S = \nu \underline{\underline{M}}_S + \mu \underline{\underline{K}}_S$ , where only the diagonal elements of the structural stiffness matrix  $\underline{\underline{K}}_S$  are multiplying a specific factor  $\mu_k$ . The off-diagonal components of the structural stiffness matrix  $\underline{\underline{K}}_S$  are not related to the structural stiffness of the structure itself but rather to the element mass  $m(r)$ 's inertial effects which is why they are not considered in the structural damping. Further, including the mass matrix  $\underline{\underline{M}}_S$  proportionality to the structural damping matrix could potentially over-damp the system at low natural frequencies because the damping ratio contribution due to inertia is inversely proportional to the frequency. In line with Eqs. (8) and (9), the total structural damping  $\underline{\underline{C}}_S = \underline{\underline{C}}_{S,floater} + \int_0^{L_{blade}} \underline{\underline{C}}_{S,blades}(r)dr$  matrix for the three-bladed wind turbine considers additional effects that are caused by the element mass  $m(r)$ 's inertia as revealed below:

$$\underline{\underline{C}}_S = \int_0^{L_{blade}} m(r) \begin{bmatrix} \sum_{l=1}^3 2D_l(r,t)\dot{D}_l(r,t) & 0 & 0 & 0 \\ 2\dot{D}_1(r,t)\phi_{1f}(r) & \mu_{a_1}\omega_{1f}^2(\phi_{1f}(r))^2 & 0 & 0 \\ 2\dot{D}_2(r,t)\phi_{1f}(r) & 0 & \mu_{a_2}\omega_{1f}^2(\phi_{1f}(r))^2 & 0 \\ 2\dot{D}_3(r,t)\phi_{1f}(r) & 0 & 0 & \mu_{a_3}\omega_{1f}^2(\phi_{1f}(r))^2 \end{bmatrix} dr + \begin{bmatrix} \mu_{\xi_5}K_{\xi_5} & 0 & 0 & 0 \\ 0 & 0 & 0 & 0 \\ 0 & 0 & 0 & 0 \\ 0 & 0 & 0 & 0 \end{bmatrix}. \quad (13)$$

To compute each  $k^{th}$  DOF's diagonal component in the structural damping matrix  $\underline{\underline{C}}_S$ , we set the log-decrement  $\delta_k$  value and then use the structural frequency  $\omega_k$  to obtain the damping factor  $\mu_k$  through:

$$\zeta_k = \frac{\delta_k}{\sqrt{4\pi^2 + \delta^2}} \approx \frac{\delta_k}{2\pi} \quad \text{and} \quad \mu_k = \frac{2\zeta_k}{\omega_k}. \quad (14)$$

The approximation for  $\zeta_k$  holds for a considerably small damping ratio  $\zeta_k$ . The torsional structural damping applied on  $\xi_5$  must represent the hydrodynamic damping effect of the floater's motion. The damping ratio for a TetraSpar floater is found in Borg et al. (2024) as  $\zeta_{\xi_5} = 3\%$  with a log-decrement of  $\delta_{\xi_5} = 0.20$ . This results in a damping factor of  $\mu_{\xi_5} = 0.30$ . Besides, for the blades DOF  $a_l$  the damping ratio is set at a very low value of  $\zeta_{a_l} = 0.5\%$  (Bak et al., 2013) with a corresponding logarithmic decrement of  $\delta_{a_l} = 0.03$  and resulting in a damping factor of  $\mu_{a_l} = 0.0024$ .

We have not included the effect of gravity so far in the model, but its effect is still represented in Figure 1. This means that  
 185 the current structural model is independent of the equilibrium or steady state floater tilt value  $\xi_5$ . This is confirmed by the  
 fact that although  $\dot{\xi}_5$  and  $\ddot{\xi}_5$  occur in the dynamic Eqs. (3) and (4), there is no explicit occurrence of  $\xi_5$  except for the linear  
 restoring term  $K_{\xi_5}$  in the Eq. (8) for translation motion. Here the linear model is valid for oscillations around any tilt value  $\xi_5$ .  
 The inclusion of gravity in the model would lead to additional terms in  $\underline{\underline{K}}_S = \underline{\underline{K}}_{S,floater} + \int_0^{L_{blade}} \underline{\underline{K}}_{S,blades}(r)dr$ , namely in  
 $\underline{\underline{K}}_{S,floater}$  and  $\underline{\underline{K}}_{S,blades}$  resulting in

$$190 \quad \underline{\underline{K}}_{S,floater} = \begin{bmatrix} K_{\xi_5} + M g H & 0 & 0 & 0 \\ 0 & 0 & 0 & 0 \\ 0 & 0 & 0 & 0 \\ 0 & 0 & 0 & 0 \end{bmatrix} \quad (15)$$

and

$$\underline{\underline{K}}_{S,blades} = \int_0^{L_{blade}} m(r) \begin{bmatrix} \sum_{l=1}^3 g D_l(r, t) & -\ddot{D}_1(r, t) \phi_{1f}(r) & -\ddot{D}_2(r, t) \phi_{1f}(r) & -\ddot{D}_3(r, t) \phi_{1f}(r) \\ g \phi_{1f}(r) & \omega_{1f}^2 (\phi_{1f}(r))^2 & 0 & 0 \\ g \phi_{1f}(r) & 0 & \omega_{1f}^2 (\phi_{1f}(r))^2 & 0 \\ g \phi_{1f}(r) & 0 & 0 & \omega_{1f}^2 (\phi_{1f}(r))^2 \end{bmatrix} dr, \quad (16)$$

under use of the small tilt assumption of  $\sin \xi_5 \approx \xi_5$ . These stiffness matrix  $\underline{\underline{K}}_S$  contributions demonstrate the additional  
 coupling effects from tilt and gravity for a floating wind turbine. For the purpose of model simplicity however, these gravity  
 195 effects have not been included in the further analysis.

## 2.2 Aerodynamic loads

The aerodynamic loads applied on the blades are the lift forces  $L_l$ , which are taken at the reference radial location  $r = d$   
 (Hansen, 2015),

$$L_l = \frac{1}{2} \rho \{c C_{L,l} V_{rel,l}^2\}_{r=d}. \quad (17)$$

200 Here  $V_{rel,l}$  is the airfoil relative velocity observed at the reference radial location  $r = d$ ,  $\rho$  denotes the air density,  $c$  is the airfoil  
 chord length, and  $C_{L,l}$  is the lift coefficient which is dependent on the angle of attack  $\alpha_l$ . As mentioned, the radial reference  
 position on the blade is the approximate location of the equivalent aerodynamic load which is comparable for an airfoil to the  
 position of the aerodynamic center along the chord length.

Since the main purpose of the model is to demonstrate methods for stability analysis, a number of simplifications are made.  
 205 To this end, the contribution of blade drag forces is neglected, as well as the induced wake velocity caused by the rotational  
 speed. The assumption that drag can be neglected is applicable because of the airfoil shape at the reference position which is  
 a streamlined thin airfoil. As for the tangential induction factor, it generates a negligible wake velocity contribution. Another  
 approximation that is part of the model, is that the floater pitch angular motion  $\xi_5$  response is assumed to be considerably small,



which suggests that one can use the small angle approximations  $\sin \xi_5 \approx \xi_5$  and  $\cos \xi_5 \approx 1$ . These approximations hold very well due to  $\xi_5$  responses being indeed very small, which will be demonstrated later in the paper through decay tests. The inflow velocity component projected perpendicularly to the rotor plane is assumed in our model not to be impacted by the floater tilt angle variation due to the small angle approximation, i.e.  $V_0 \cos \xi_5 \approx V_0$ . According to this assumption, the resulting blade aerodynamic load  $F_{l,aero}$  projected perpendicularly to the rotor plane can also abide to the same approximation and assumed to be influenced by a non projected inflow velocity  $V_0$ .

### 2.2.1 Velocity triangle

The key velocity variables that constitute the relative velocity  $V_{rel,l}$  for an airfoil are the inflow velocity  $V_{0,l}$  and the rotational speed  $V_{rot}$ . The relations between these velocity triangle variables are illustrated in Figure 2.

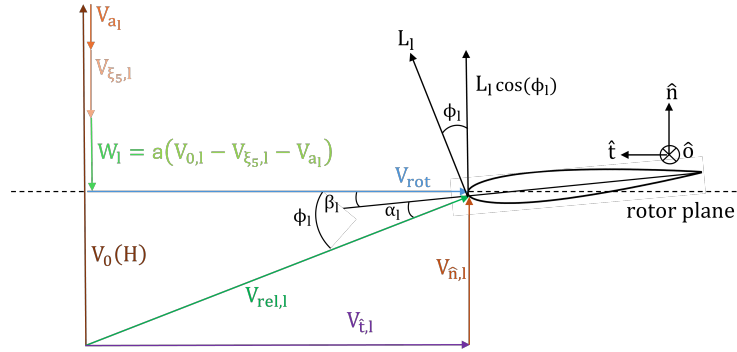

**Figure 2.** The airfoil velocity triangle expressed in a coordinate system composed of a tangential ( $\hat{t}$ ), normal ( $\hat{n}$ ) and outward ( $\hat{o}$ ) unit vector.

From Figure 2 several geometric relations are inferred and one of them is simply  $V_{rel,l}^2 = V_{n,l}^2 + V_{t,l}^2$ . The relative velocity  $V_{rel,l}$  has an orientation which is given by the inflow angle  $\phi_l$  and the following trigonometric relation  $\phi_l = \tan^{-1}(-V_{n,l}/V_{t,l})$  is deduced. The inflow angle  $\phi_l$  is also described as the sum of the twist angle  $\beta_l$  with the angle of attack  $\alpha_l$ , which reads as  $\phi_l = \alpha_l + \beta_l$ .

Besides, the relative velocity  $V_{rel,l}$  is affected by the wake velocity  $W_l$ . The induced wake velocity  $W_l$  has only a velocity component that is orientated in the normal direction to the rotor plane and it is characterised by the induction factor  $a$ . On this basis, the radial and tangential velocity to the rotor plane,  $V_{t,l}$ , is the rotational velocity  $V_{rot} = -\Omega d$  at  $r = d$ . The contribution from the rotational wake induction factor  $a'$  is negligible and hence chosen to be ignored in this analysis, meaning that  $V_{t,l} = V_{rot}$ .

The velocity  $V_{n,l}$ , normal to the rotor plane, is influenced by the inflow velocity  $V_0$ , the velocity perceived on the airfoil due to the blade deflection  $V_{a_l}$  and by the velocity caused by the floater's pitch angular motion  $V_{\xi_5,l}$ . This leads to

$$V_{n,l} = (1 - a) \left( V_0(H) - \underbrace{\dot{\xi}_5(H + d \cos \Psi_l)}_{V_{\xi_5,l}} - \underbrace{\dot{a}_l \phi_{1f}(d)}_{V_{a_l}} \right). \quad (18)$$

Given Eq. (18),  $V_{\hat{n},l}^2$  is expanded as

$$V_{\hat{n},l}^2 = \underbrace{(1-a)^2 V_0^2(H)}_{\text{steady term}} + \underbrace{(1-a)^2 \left( 2\dot{\xi}_5 (H + d \cos \Psi_l) \dot{\alpha}_l \phi_{1f}(d) + \xi_5^2 (H + d \cos \Psi_l)^2 + \dot{\alpha}_l^2 (\phi_{1f}(d))^2 \right)}_{\text{higher order terms neglected}} + \underbrace{+ 2(1-a)^2 V_0(H) \left( -\dot{\xi}_5 (H + d \cos \Psi_l) - \dot{\alpha}_l \phi_{1f}(d) \right)}_{\text{damping contribution}}. \quad (19)$$

For linearization purposes, higher order terms of  $V_{\hat{n},l}^2$  are neglected in the derivations to come.

Using the previous aerodynamic identities, the lift force  $L_l$  is projected in the normal direction to the rotor plane as can be seen in Figure 2. This projection is done by utilizing the inflow angle  $\phi_l$ ,

$$F_l = L_l \cos \phi_l. \quad (20)$$

The aerodynamic load  $F_l$  is a driver of the floating wind turbine's motion. It is linearized as:

$$\frac{\partial (L_{l,lin} \cos \phi_{l,lin})}{\partial \cdot} = \frac{1}{2} \rho c \left( \left. \frac{\partial C_{L,l}}{\partial \cdot} \right|_{st} \cos \phi_{st} V_{rel,st}^2 + C_{L,st} \left. \frac{\partial \cos \phi_{l,lin}}{\partial \cdot} \right|_{st} V_{rel,st}^2 + C_{L,st} \cos \phi_{st} \left. \frac{\partial (V_{rel,l}^2)}{\partial \cdot} \right|_{st} \right), \quad (21)$$

where the label  $st$  represents the steady state value of a variable. In Eq. (21), the variables  $C_{L,l,lin}$ ,  $\cos \phi_{l,lin}$ , and  $V_{rel,l,lin}^2$  are linearized in the same fashion as  $Y_{l,lin}$ ,

$$Y_{l,lin} = Y_{l,st} + \Delta Y = Y_{l,st} + \left. \frac{\partial Y_l}{\partial \dot{\alpha}_l} \right|_{st} \dot{\alpha}_l + \left. \frac{\partial Y_l}{\partial f_{s,l}} \right|_{st} f_{s,l} + \left. \frac{\partial Y_l}{\partial \dot{\xi}_5} \right|_{st} \dot{\xi}_5. \quad (22)$$

The linearization contribution  $\left. \frac{\partial Y_l}{\partial f_{s,l}} \right|_{st} f_{s,l}$  that pertains to the dynamic stall variable  $f_s$  will be introduced later in the dynamic stall subsection. For the linearization of  $L_{l,lin}$ , one consideration required to be taken into account is that  $V_{\hat{t},l}$  is constant, which entails that

$$\frac{\partial V_{rel,l}^2}{\partial \cdot} = \frac{\partial V_{\hat{n},l}^2}{\partial \cdot}. \quad (23)$$

For the development of the linear model, using Eq. (21), it can be demonstrated that the partial derivative of  $V_{\hat{n},l}$  is involved in the linearization of the force  $F_l$ . The partial derivative of  $V_{\hat{n},l}$  appears notably when deriving the inflow angle  $\phi_l$  with respect to other variables as

$$\frac{\partial \phi_l}{\partial \cdot} = \frac{1}{-V_{\hat{t},st} \left( \frac{V_{\hat{n},st}^2}{V_{\hat{t},st}^2} + 1 \right)} \frac{\partial V_{\hat{n},l}}{\partial \cdot}. \quad (24)$$

The partial derivative of the lift coefficient  $C_{L,l}$  is dependant on the angle of attack  $\alpha_l$  and the dynamic stall variable  $f_{s,l}$ . Details related to the the dynamic stall lift coefficient are clarified later in the paper. Hence, it remains to analyze for the linear

model the partial derivative of  $\cos \phi_l$ , which is found to be

$$\frac{\partial \cos \phi_l}{\partial \cdot} = - \frac{V_{\hat{n},st}}{V_{\hat{t},st}^2 \left( \frac{V_{\hat{n},st}^2}{V_{\hat{t},st}^2} + 1 \right)^{\frac{3}{2}}} \frac{\partial V_{\hat{n},l}}{\partial \cdot}. \quad (25)$$

The aerodynamic forcing terms from Eqs. (8) and (9) are linearized as  $GF_{a_l,lin} = F_{l,lin} L_{blade} \phi_{1f}(d)$  and  
 255  $M_{aero,lin} = \sum_{l=1}^{N_b} F_{l,lin} L_{blade} (H + d \cos \Psi_l)$  through the linearization of variables  $C_{L,l,lin}$ ,  $\cos \phi_{l,lin}$ , and  $V_{rel,l,lin}^2$  as shown in Eq. (21).

We can now build a linearized model, characterized by the index  $L$ , for the use in stability analysis. For that to occur, a part of the aerodynamic loading from  $\underline{F}_T$  in Eq. (9) is moved from the right hand side to the left hand side and then linearized in the form of an added aerodynamic damping matrix contribution noted  $\underline{\underline{C}}_A$ ,

$$260 \quad \underline{\underline{M}}_S \ddot{x} + \left( \underline{\underline{C}}_S + \underline{\underline{C}}_A \right) \dot{x} + \underline{\underline{K}}_S x = \underline{F}_L. \quad (26)$$

In the EOM from Eq. (26) which pertains to the linearized model, the damping matrix is altered due to the added linearized aerodynamic damping matrix  $\underline{\underline{C}}_A$  consideration. The partial derivatives of the forcing variables  $M_{aero,lin}$  and  $GF_{a_l,lin}$  allows to put together that linearized aerodynamic damping matrix contribution  $\underline{\underline{C}}_A$  as

$$\underline{\underline{C}}_A = \begin{bmatrix} -\frac{\partial M_{aero,lin}}{\partial \xi_5} & -\frac{\partial M_{aero,lin}}{\partial \dot{a}_1} & -\frac{\partial M_{aero,lin}}{\partial \dot{a}_2} & -\frac{\partial M_{lin}}{\partial \dot{a}_3} \\ -\frac{\partial GF_{a_1,lin}}{\partial \xi_5} & -\frac{\partial GF_{a_1,lin}}{\partial \dot{a}_1} & 0 & 0 \\ -\frac{\partial GF_{a_2,lin}}{\partial \xi_5} & 0 & -\frac{\partial GF_{a_2,lin}}{\partial \dot{a}_2} & 0 \\ -\frac{\partial GF_{a_3,lin}}{\partial \xi_5} & 0 & 0 & -\frac{\partial GF_{a_3,lin}}{\partial \dot{a}_3} \end{bmatrix}_{st}. \quad (27)$$

265 The partial derivatives within  $\underline{\underline{C}}_A$  are all evaluated at steady state ( $st$ ) conditions for the linear model, given an operational point with a specific rotational speed  $\Omega$  and inflow velocity  $V_0$ .

### 2.2.3 Dynamic stall model

To evaluate the stability of a floating wind turbine model with aerodynamic states, we include a dynamic stall model. The variation of the angle of attack on an airfoil does not impact immediately the aerodynamic lift and drag forces due to the inertia  
 270 resulting in a time delay. Due to its simple implementation, we decide to include Øye's linear dynamic stall model (Øye, 1991) which does take into account that time delay effect on aerodynamic loads. According to Øye's model, the dynamic stall can be expressed in the lift coefficient  $C_L$  through the flow separation function variable  $f_s$ . The variable  $f_s$  indicates the trailing edge flow separation point location  $x$ , starting from the leading edge, as a ratio with respect to chord length, i.e.  $f_s = x/c$  (Hansen et al., 2004a). The value of  $f_s = 1$  corresponds to stall not occurring signifying that the flow remains fully attached. On the  
 275 contrary, a value of  $f_s = 0$  implies that the separation occurs at the leading edge of the airfoil and that the flow is actually fully separated. According to Øye's dynamic stall model, the influence of  $f_s$  on the the lift coefficient  $C_L$  is

$$C_L(\alpha_l, f_s) = f_s C_{L,inv}(\alpha_l) + (1 - f_s) C_{L,stall}(\alpha_l). \quad (28)$$

In this context,  $C_{L,inv}(\alpha)$  refers to the inviscid or fully attached flow lift coefficient, whereas  $C_{L,stall}(\alpha)$  relates to a fully separated flow. Considering that the angle of attack value  $\alpha$  would be known, both lift coefficients  $C_{L,inv}(\alpha)$  and  $C_{L,stall}(\alpha)$  are determined by the airfoil data from Figure 3. For the linearization of  $C_L$  from Eq. (28), a set of partial derivatives are established, including  $\frac{\partial C_{L,l}}{\partial \alpha_l}$  and  $\frac{\partial C_{L,l}}{\partial f_{s,l}}$  respectively as

$$\frac{\partial C_{L,l}}{\partial \alpha_l} = f_s \left. \frac{\partial C_{L,inv,l}}{\partial \alpha_l} \right|_{st} + (1 - f_s) \left. \frac{\partial C_{L,stall,l}}{\partial \alpha_l} \right|_{st} \quad \text{and} \quad \frac{\partial C_{L,l}}{\partial f_{s,l}} = C_{L,inv} - C_{L,stall}. \quad (29)$$

By making use of the airfoil data from Figure 3, the values of  $\left. \frac{\partial C_{L,inv,l}}{\partial \alpha_l} \right|_{st}$  and  $\left. \frac{\partial C_{L,stall,l}}{\partial \alpha_l} \right|_{st}$  are computed numerically as gradients at the operational angle of attack  $\alpha_l$  through a cubic spline interpolation. Lastly, to fill out the linear model's aerodynamic damping matrix  $\underline{\underline{C}}_A$  according to Eq. (21), the partial derivative of the lift coefficient  $C_{L,l}$  with respect to  $\dot{\underline{x}} = [\dot{\xi}_5, \dot{a}_1, \dot{a}_2, \dot{a}_3]^T$  is elucidated by using the previous partial derivative identity from Eq. (24):

$$\frac{\partial C_{L,l}}{\partial \cdot} = \frac{\partial C_{L,l}}{\partial \alpha_l} \frac{\partial \alpha_l}{\partial \cdot} = \frac{\partial C_{L,l}}{\partial \alpha_l} \frac{\partial \phi_l}{\partial \cdot}. \quad (30)$$

The linearization of  $C_L$  with respect to  $f_s$  is next included in the forcing vector  $\underline{F}_T$  from the time domain model and in  $\underline{F}_L$  from the linear model as:

$$\underline{F}_T = \begin{bmatrix} M_{aero} + M_F = \sum_{l=1}^3 L_{blade}(H + d \cos \Psi_l) \cdot \left( \frac{1}{2} \rho c \left( \frac{\partial C_{L,l}}{\partial f_{s,l}} f_{s,l} + C_{L,stall,l} \right) \cos \phi_{st} V_{rel,st}^2 \right) + M_F \\ GF_{a,1,lin} = L_{blade} \phi_{1f}(d) \left( \frac{1}{2} \rho c \left( \frac{\partial C_{L,1}}{\partial f_{s,1}} f_{s,1} + C_{L,stall,1} \right) \cos \phi_{st} V_{rel,st}^2 \right) \\ \vdots \end{bmatrix} \quad \text{and} \quad (31)$$

$$\underline{F}_L = \begin{bmatrix} \sum_{l=1}^3 L_{blade}(H + d \cos \Psi_l) \cdot \left( \frac{1}{2} \rho c \left( \left. \frac{\partial C_{L,l}}{\partial f_{s,l}} \right|_{st} f_{s,l} \right) \cos \phi_{st} V_{rel,st}^2 \right) + M_F \\ L_{blade} \phi_{1f}(d) \left( \frac{1}{2} \rho c \left( \left. \frac{\partial C_{L,1}}{\partial f_{s,1}} \right|_{st} f_{s,1} \right) \cos \phi_{st} V_{rel,st}^2 \right) \\ \vdots \end{bmatrix}.$$

The time domain model forcing vector  $\underline{F}_T$  considers a linear  $f_s$  contribution through a  $C_L$  variation dictated by Eq. (28). Because the aerodynamic damping force is included in  $\underline{F}_T$ , what remains from it in  $\underline{F}_L$  is only the contribution of the partial derivative  $\left. \frac{\partial C_{L,l}}{\partial f_{s,l}} \right|_{st} = C_{L,inv}|_{st} - C_{L,stall}|_{st}$  which is expressed as a constant gradient evaluated at the operational point's steady state condition. Knowing the identities for  $\underline{F}_T$  and  $\underline{F}_L$  as well as  $C_L$ 's linearized formulation, a Jacobian matrix of partial derivatives can be derived for both forcing vectors  $\underline{F}$  at each  $i^{th}$  row,  $\underline{F}_i$ . The Jacobian matrix of partial derivatives for  $\underline{F}_i$  with respect to  $f_{s,j}$  on the  $j^{th}$  column is identified as  $\left[ \frac{\partial \underline{F}_i}{\partial \underline{f}_{s,j}} \right]$  and has the following composition:

$$\left[ \frac{\partial \underline{F}_i}{\partial \underline{f}_{s,j}} \right] = \begin{bmatrix} \frac{\partial M_{aero,lin}}{\partial f_{s,1}} & \frac{\partial M_{aero,lin}}{\partial f_{s,2}} & \frac{\partial M_{aero,lin}}{\partial f_{s,3}} \\ \frac{\partial GF_{a_1,lin}}{\partial f_{s,1}} & 0 & 0 \\ 0 & \frac{\partial GF_{a_2,lin}}{\partial f_{s,2}} & 0 \\ 0 & 0 & \frac{\partial GF_{a_3,lin}}{\partial f_{s,3}} \end{bmatrix}, \quad (32)$$

with its assembly directly influenced by the partial derivative  $\frac{\partial C_{L,i}}{\partial f_{s,j}}$ . For the time domain model, the Jacobian matrix  $\left[ \frac{\partial \underline{F}_i}{\partial \underline{f}_{s,j}} \right]$  varies in time as the simulation progresses. On the contrary, for the linear model case,  $\left[ \frac{\partial \underline{F}_i}{\partial \underline{f}_{s,j}} \right]$  is constant and affected

300 by aerodynamic parameters that are fixed at steady state values found for a given operational point with a particular inflow velocity  $V_0$  and rotational speed  $\Omega$ .

To be able to compute the lift coefficient  $C_L$  that influences the aerodynamic loading, a dynamic stall Ordinary Differential Equation (ODE) for  $f_s$  is defined as

$$\dot{f}_{s,l} = \frac{f_{s,static,l} - f_{s,l}}{\tau}. \quad (33)$$

305 Here  $\tau$  identifies a steady state time constant which is inversely proportional to the steady state relative velocity but directly proportional to the chord length,  $\tau = (4c)/V_{rel,st}$ . In agreement with previous explanations about stall occurrence, the static value of  $f_s$ , i.e.  $f_{s,static}$ , reaches 0 when there is a full separation of the flow. Simultaneously, the dynamic stall contribution to  $C_L$ , called  $C_{L,stall}(\alpha)$ , reaches then a maximum value. Stall itself starts taking place when the static lift coefficient curve  $C_{L,static}$  reaches a maximum value, and then  $f_{s,static}$  is close to 0.5 for the current airfoil being FFA-W3-241. Figure 3  
310 exhibits the relations between the multiple aerodynamic that have been introduced.

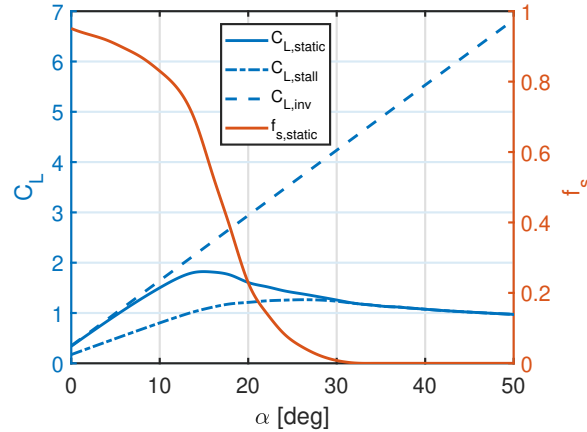

**Figure 3.** Airfoil FFA-W3-241 dynamic stall data with respect to angle of attack  $\alpha$ , and valid at the reference radial position  $r = d$ .

In the linearized model,  $\dot{f}_{s,l}$  is linearized with respect to the four structural DOFs of the system and the three aerodynamic DOFs  $f_{s,l}$ . This requires to take into account the full linearization of the  $\dot{f}_s$  ODE by including the linearization of the  $f_{s,static,l}$  variable as well,

$$\dot{f}_{s,l,lin} = -\frac{f_{s,l}}{\tau} + \frac{1}{\tau} \left( f_{s,static}|_{st} + \frac{\partial f_{s,static,l}}{\partial \alpha_l} \Big|_{st} \frac{\partial \phi_l}{\partial \xi_5} \Big|_{st} \dot{\xi}_5 + \frac{\partial f_{s,static,l}}{\partial \alpha_l} \Big|_{st} \frac{\partial \phi_l}{\partial \dot{a}_l} \Big|_{st} \dot{a}_l \right). \quad (34)$$

315 This complete linearization translates in the following two Jacobian matrices represented as

$$\left[ \frac{\partial \dot{f}_{s,i}}{\partial \dot{x}_{4 \times 1,j}} \right]_{3 \times 4} = \begin{bmatrix} \frac{\partial \dot{f}_{s,1}}{\partial \xi_5} & \frac{\partial \dot{f}_{s,1}}{\partial \dot{a}_1} & 0 & 0 \\ \frac{\partial \dot{f}_{s,2}}{\partial \xi_5} & 0 & \frac{\partial \dot{f}_{s,2}}{\partial \dot{a}_2} & 0 \\ \frac{\partial \dot{f}_{s,3}}{\partial \xi_5} & 0 & 0 & \frac{\partial \dot{f}_{s,3}}{\partial \dot{a}_3} \end{bmatrix}_{st} \quad (35)$$

and  $\left[\frac{\partial \underline{f}_{s,i}}{\partial \underline{f}_{s,j}}\right]_{3 \times 3}$  which is a diagonal constant matrix with components on the  $i^{th}$  row and  $j^{th}$  column being equal to  $-1/\tau$ . To evaluate for the linear model the partial derivative  $\left.\frac{\partial f_{s,static,l}}{\partial \alpha_l}\right|_{st}$  in Eq. (34), the numerical gradient is determined at the corresponding operational angle of attack  $\alpha_l$  through the use of the airfoil data from Figure 3. It is observable in Figure 4 the numerical result for the gradient  $\left.\frac{\partial f_{s,static,l}}{\partial \alpha_l}\right|_{st}$  calculated via a cubic spline interpolation for a wide range of angles of attack.

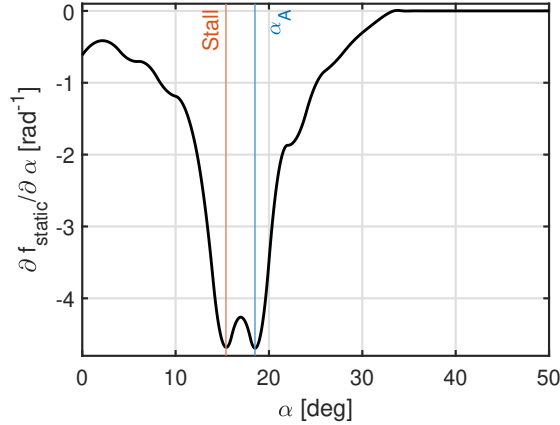

**Figure 4.** Numerical gradient  $\partial f_{s,static}/\partial \alpha$  as a function of the angle of attack  $\alpha$ .

The angles of attack labeled as *Stall* and  $\alpha_A$  refer respectively to the beginning of flow separation and the end of the flow separation transitioning region.

### 2.3 State-space representation

When combining the time domain model EOM, which is a second order ODE (see Eq. (10)), with the first order dynamic stall ODE (see Eq. (33)), we can rewrite the system as a first order state-space model. This formulation comprises of a system matrix  $\underline{A}$ , a state vector  $\underline{q}$  and a forcing input vector  $\underline{F}_B$ ,

$$\dot{\underline{q}} = \underline{A}\underline{q} + \underline{F}_B. \quad (36)$$

The state vector  $\underline{q} = [\underline{x}_{4 \times 1}^T, \dot{\underline{x}}_{4 \times 1}^T, f_{s,1}, f_{s,2}, f_{s,3}]^T$  includes the structural DOFs vector  $\underline{x}$ , its time derivative  $\dot{\underline{x}}$  as well as the variable  $f_{s,l}$  for each blade. The length of state  $\underline{q}$ , labeled as  $N_s$ , is  $N_s = 11$  for a three-bladed wind turbine. The response of  $\underline{q}$  is quantified in terms of variations from the steady state values, which are determined through simulations using the time

domain model. Finally, the state-space system matrix  $\underline{\underline{A}}$  is built for the time domain and linearized model respectively as

$$\underline{\underline{A}}_T = \begin{bmatrix} \begin{bmatrix} \underline{\underline{0}}_{4 \times 4} \\ \underline{\underline{0}}_{3 \times 4} \end{bmatrix} & \begin{bmatrix} \underline{\underline{I}}_{4 \times 4} \\ \underline{\underline{0}}_{3 \times 4} \end{bmatrix} & \begin{bmatrix} \underline{\underline{0}}_{4 \times 3} \\ \left[ \underline{\underline{M}}_S^{-1} \left[ \frac{\partial \underline{\underline{F}}_i}{\partial \underline{\underline{f}}_{-s,j}} \right] \right]_{4 \times 3} \\ \left[ \frac{\partial \underline{\underline{f}}_{-s,i}}{\partial \underline{\underline{f}}_{-s,j}} \right]_{3 \times 3} \end{bmatrix} \end{bmatrix} \quad \text{and} \quad (37)$$

$$\underline{\underline{A}}_L = \begin{bmatrix} \begin{bmatrix} \underline{\underline{0}}_{4 \times 4} \\ \underline{\underline{0}}_{3 \times 4} \end{bmatrix} & \begin{bmatrix} \underline{\underline{I}}_{4 \times 4} \\ \left[ \frac{\partial \underline{\underline{f}}_{-s,i}}{\partial \underline{\underline{\dot{x}}}_j} \right]_{3 \times 4} \end{bmatrix} & \begin{bmatrix} \underline{\underline{0}}_{4 \times 3} \\ \left[ \underline{\underline{M}}_S^{-1} \left[ \frac{\partial \underline{\underline{F}}_i}{\partial \underline{\underline{f}}_{-s,j}} \right] \right]_{4 \times 3} \\ \left[ \frac{\partial \underline{\underline{f}}_{-s,i}}{\partial \underline{\underline{f}}_{-s,j}} \right]_{3 \times 3} \end{bmatrix} \end{bmatrix}_{st}.$$

It is important to recall that the linear model system matrix  $\underline{\underline{A}}_L$  matrix components are all evaluated at steady state (*st*) conditions. In contrast, the time domain model matrix  $\underline{\underline{A}}_T$  has partial derivatives that vary in time. For simulations with a forced response, the time domain model state-space forcing vector  $\underline{\underline{F}}_{B,T}$  is, just like  $\underline{\underline{A}}_T$ , impacted implicitly by a variation of aerodynamic parameters. On the other hand, the linearized model's forcing vector  $\underline{\underline{F}}_{B,L}$  contains only a platform pitch forcing moment  $M_F$  contribution because it accounts for a response variation around steady state. This is summarized as

$$\underline{\underline{F}}_{B,T} = \begin{bmatrix} \begin{bmatrix} \underline{\underline{0}}_{4 \times 1} \\ \left[ \sum_{l=1}^3 L_{blade} (H + d \cos \Psi_l) \cdot \left( \frac{1}{2} \rho c C_{L, stall, l} \cos \phi_{st} V_{rel, st}^2 \right) + M_F \right] \\ L_{blade} \phi_{1f}(d) \left( \frac{1}{2} \rho c C_{L, stall, 1} \cos \phi_{st} V_{rel, st}^2 \right) \\ \vdots \\ \begin{bmatrix} f_{s, static, 1} / \tau \\ f_{s, static, 2} / \tau \\ f_{s, static, 3} / \tau \end{bmatrix} \end{bmatrix} \end{bmatrix} \quad \text{and} \quad \underline{\underline{F}}_{B,L} = \begin{bmatrix} \begin{bmatrix} \underline{\underline{0}}_{4 \times 1} \\ M_F \\ \underline{\underline{0}}_{3 \times 1} \end{bmatrix} \end{bmatrix}. \quad (38)$$

### 340 3 Model verification

After the state-space representation of the time domain and linear model is completed, time domain simulations are performed to assess how both models function in terms of decay tests and dynamic stall responses. These simulations serve as a model verification as well.

#### 3.1 Decay tests

345 To verify that the linear model (LM) has been fully linearized and that it behaves in a physically correct manner, decay tests simulations are carried out to compare results with the time domain model (TDM). Results are presented as variations from the steady state values. The simulations conditions consider an operational point of  $V_0 = 8 \text{ m s}^{-1}$  and  $\Omega = 0.6 \text{ rad s}^{-1}$ . The corresponding steady state angle of attack and lift coefficient are located in a region where the flow is not fully attached

and closer to stall than the inviscid region, see Figure 3. The initial space perturbations for the structural DOFs ( $\xi_5$  and  $a_l$ ) are equal to the negative value of the steady state values, and the initial conditions for the dynamic stall  $f_{s,l}$  variables are the corresponding values for those structural DOFs initial conditions. This means that  $\xi_5(t=0) = -0.02$  rad,  $a_l(t=0) = -7.11$  m, and  $f_{s,l}(t=0) = -0.67$ .

The results from Figure 5 show that the steady state plateau values for the  $a_l$  and the  $f_{s,l}$  signals are reached in a very short time span. The time domain plots also confirm that there is no disparity between the results obtained with the time domain model (TDM) and the linear model (LM). Time responses also indicate that the system is highly damped with regards to the  $a_l$  and the  $f_{s,l}$  DOFs in comparison to the floater pitch  $\xi_5$  which has not reached its steady state value yet in the time frame displayed here.

In the frequency domain, the PSD plots in the right column of Figure 5 capture at the peaks the natural frequency of the floater pitch motion,  $\omega_{\xi_5}$ , for the  $\xi_5$  signal but also the shifted frequencies of  $-\omega_{\xi_5} + \Omega$  and  $\omega_{\xi_5} + \Omega$  in the other signals ( $a_l$  and  $f_{s,l}$ ) because of the system's periodicity. This entails that eigenfrequencies shifted by  $\pm m\Omega$ , where  $m$  is an integer, are also part of the response. The blade natural frequency,  $\omega_{1f} = 0.6255$  Hz, cannot be captured by any signal with a decay test due to a very high aerodynamic damping contribution. It was investigated by the authors (Pamfil et al., 2024) that the blade natural frequency was well captured once the aerodynamic damping contribution was numerically reduced by decreasing the air density,  $\rho$ .

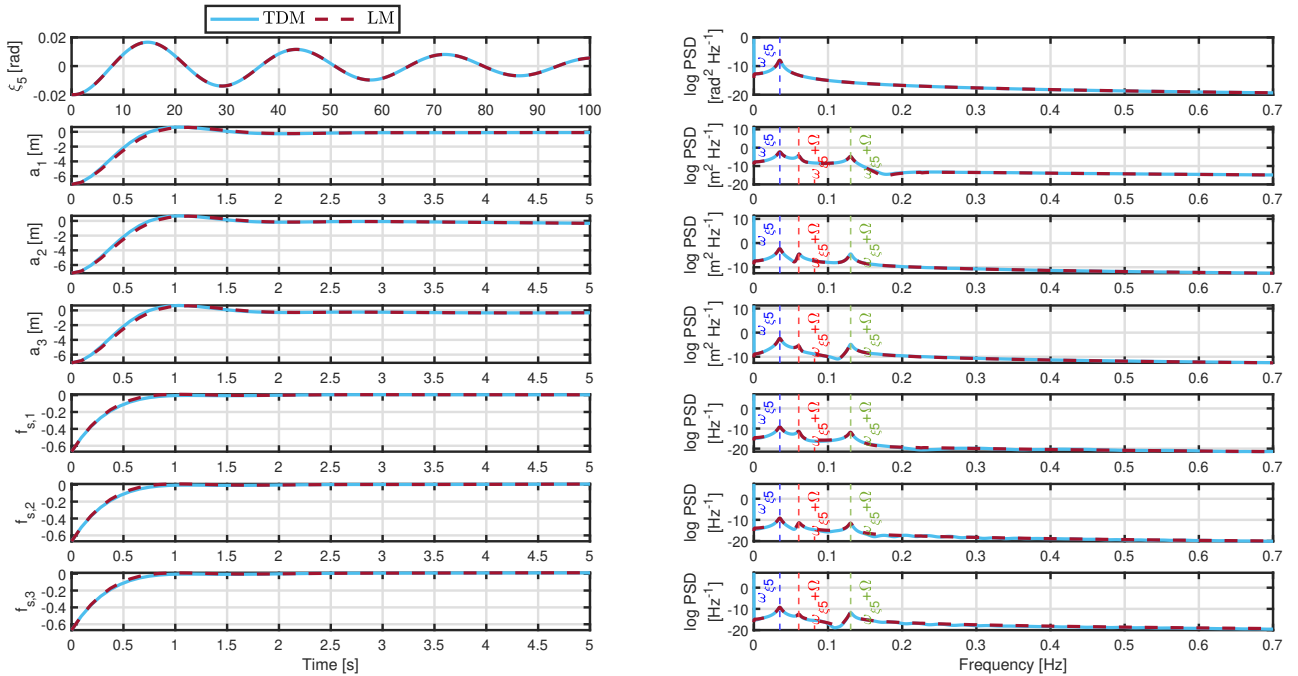

**Figure 5.** Decay test for the operational point of  $V_0 = 8 \text{ m s}^{-1}$ ,  $\Omega = 0.6 \text{ rad s}^{-1}$  and  $\tau = 0.34 \text{ s}$ , where time domain model (TDM) and linear model (LM) results are compared.



To test furthermore the correct implementation of the linearized model compared to results generated with the time domain model, we analyze on  $C_L$ - $\alpha$  plots the hysteresis behavior of the airfoil's lift due to the dynamic stall.

### 3.2.1 Operational point and floater pitch moment variation

The most direct way to verify the  $C_L$ - $\alpha$  responses in the stall region is to vary the platform pitch moment  $M_F$  that is given by  
370 a harmonic time dependence as follows:

$$M_F = A_M \cos(\Omega_M t), \quad (39)$$

with in amplitude  $A_M$  and excitation frequency  $\Omega_M$ . The amplitude  $A_M$  is varied depending on the chosen operational point to achieve the desired angle of attack variation resulting in the hysteresis behavior that can be noticeable on  $C_L$ - $\alpha$  plots.

Figure 6 reports the time domain model (TDM) and linear model (LM) results for three operational conditions with the same  
375 inflow velocity of  $V_0 = 8 \text{ ms}^{-1}$ . For each operational point, the floater pitch moment excitation amplitude  $A_M$  is changed whereas its excitation frequency  $\Omega_M$  is fixed at 0.15 Hz,  $\Omega_M = 0.94 \text{ rad s}^{-1}$ . The three operational points that are experimented are located at the onset of stall, before, and right after, respectively, to allow to examine more clearly the hysteresis behavior for a high fluctuation of the lift and angle of attack values. The results for the point located where the flow is not fully attached and in the pre-stall region are presented on the first row, and they are achieved with a rotor speed of  $\Omega = 0.43 \text{ rad s}^{-1}$ , a  
380 nominal time constant  $\tau_{nom} = 0.47 \text{ s}$  and  $A_M = 1.212 \cdot 10^9 \text{ Nm}$ . The results presented in the second and third row in Figure 6 are related to an operational point located respectively at the stall region around  $\alpha = 15 \text{ deg}$  and nearby at a higher angle of attack. The simulations conditions for the second and third row are respectively a rotor speed of  $\Omega = 0.38 \text{ rad s}^{-1}$  and  $\Omega = 0.35 \text{ rad s}^{-1}$ , a nominal time constant of  $\tau_{nom} = 0.52 \text{ s}$  and  $\tau_{nom} = 0.56 \text{ s}$ , and a platform pitch moment amplitude of  $A_M = 9.70 \cdot 10^8 \text{ Nm}$  and  $A_M = 1.212 \cdot 10^9 \text{ Nm}$ . The distinction for the three different operational conditions in terms of  
385 nominal time constant  $\tau_{nom} = (4c)/V_{rel,st}$  arises from the difference in steady relative velocity  $V_{rel,st} = \sqrt{V_{\hat{n},l}^2 + V_{\hat{t},l}^2}$  through the tangential velocity component  $V_{\hat{t},l} = -\Omega d$ , see airfoil velocity triangle in Figure 2.

Further, the time frame chosen to be plotted captures entirely the steady state cyclic behavior of the lift coefficient and angle of attack for more than one cycle.

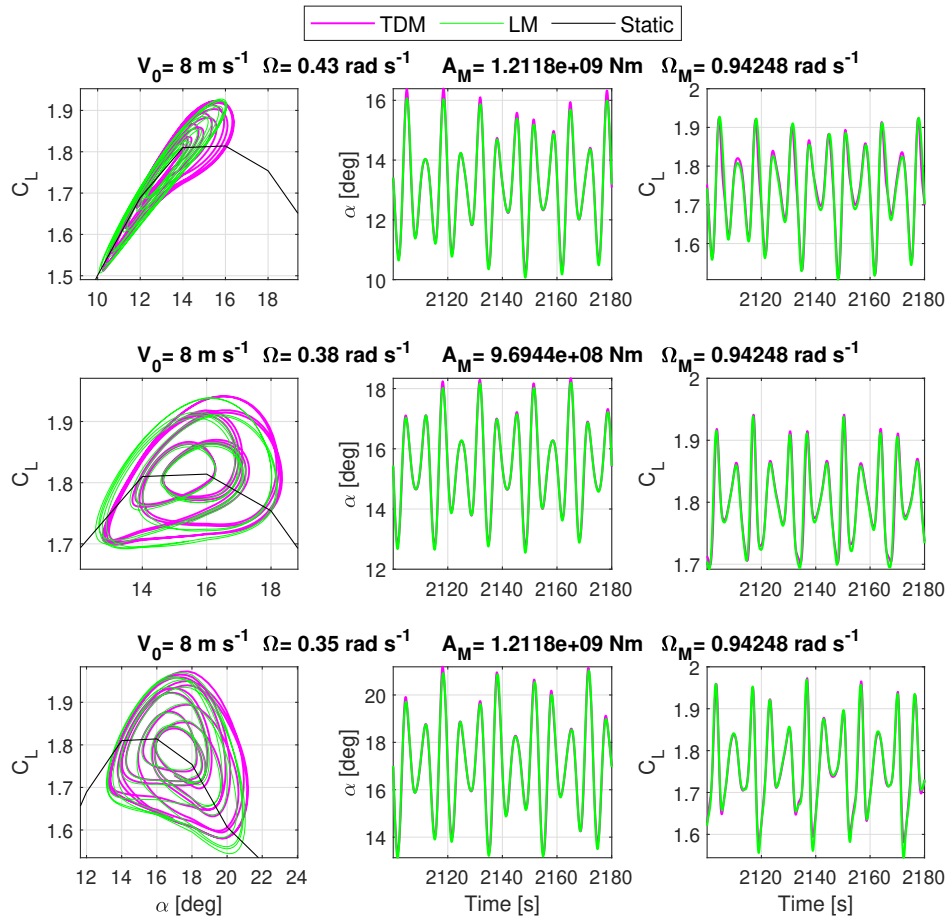

**Figure 6.** Dynamic lift and stall behaviour at three different operational points surrounding the stall region, with a varying forcing moment applied on the floater pitch DOF, and where the time domain model (TDM) and linear model (LM) results are compared.

The hysteresis phenomenon is caused by the time delay effect in the region of the operational point, see airfoil data in Figure 3. There is a good overall match between the time domain and linear model time series for  $\alpha$  and  $C_L$ . Both the time domain and linear models are able to describe the stall phenomenon. This difference between results is more pronounced in the region before stall, where the hysteresis curves are more elongated.

### 3.2.2 Influence from time constant

The aerodynamic damping depends on the time constant  $\tau$  from the dynamic stall model, and it influences the hysteresis behavior of the system in the the region where the flow is not fully attached and before the onset of stall. Varying  $\tau$ 's value in the dynamic stall model with respect to a reference nominal value  $\tau_{nom} = 0.34$  s would clarify what is the impact on the angle of attack  $\alpha$  and lift coefficient  $C_L$ , and it demonstrates the effect on the aerodynamic damping. Simulations are executed

at an operational point of  $V_0 = 8 \text{ m s}^{-1}$  and  $\Omega = 0.6 \text{ rad s}^{-1}$  with a steady state angle of attack  $\alpha = 8.32 \text{ deg}$ . The region of this operational point is not in the inviscid region because the flow is not fully attached, but it still precedes the onset of stall. To observe the effect of  $\tau$ 's change on  $C_L$ - $\alpha$  graphs there is a platform pitch forcing applied with fixed parameters for the amplitude,  $A_M = 1.2118e+09 \text{ NM}$ , and for the excitation frequency set at 0.15 Hz,  $\Omega_M = 0.15 \cdot 2\pi \text{ rad s}^{-1}$ . We investigate this hysteresis behavior of the lift coefficient and angle of attack time series and compare results between the time domain model (TDM) and linear model (LM). In Figure 7, the hysteresis effect is studied for an angle of attack ranging from  $\alpha = 6.47 \text{ deg}$  to  $\alpha = 10.11 \text{ deg}$ . The dynamic stall  $\tau$  parameter's intensity is varied by a factor of 0.15, 1 and 100 applied to the nominal value  $\tau_{nom} = 0.34 \text{ s}$ .

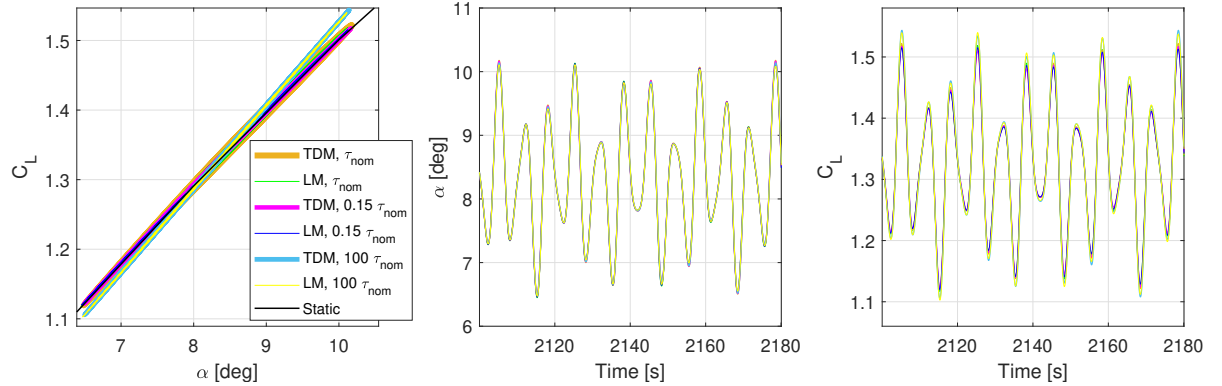

**Figure 7.** Hysteresis results for simulations with the operational point of  $V_0 = 8 \text{ m s}^{-1}$  and  $\Omega = 0.6 \text{ rad s}^{-1}$ , with a forcing moment applied on the floater pitch DOF, and where time domain model (TDM) and linear model (LM) results are compared.

The variation of  $\tau$ 's value helps to visualize on a  $C_L$ - $\alpha$  plot the impact on the slope  $\frac{\partial C_L}{\partial \alpha}$  during the cyclic motion of the platform pitch. Results point out that a higher value of  $\tau$  brings about a higher slope  $\frac{\partial C_L}{\partial \alpha}$ . After performing an analytical integration of the ODE from Eq. (33), this conclusion can be supported by studying the influence of  $\tau$  on the solution of the dynamic stall variable  $f_s$ . It is explicitly expressed at a current time step  $t + \Delta t$  for a small time step increment of  $\Delta t$ ,

$$f_s(t + \Delta t) = f_{s,static} + (f_s(t) - f_{s,static}) e^{(-\frac{\Delta t}{\tau})}. \quad (40)$$

It is discernible in Eq. (40) that a larger time constant  $\tau$  leads to a larger exponential factor  $e^{(-\frac{\Delta t}{\tau})}$ . This inevitably increases  $f_s(t + \Delta t)$  through the term  $(f_s(t) - f_{s,static}) e^{(-\frac{\Delta t}{\tau})}$ . In compliance with Eq. (29) for  $\frac{\partial C_L}{\partial \alpha}$ , a greater value of  $f_s$  induces a higher slope  $\frac{\partial C_L}{\partial \alpha}$ . To recapitulate,  $\tau$ 's variation has an outcome that is noticeable on a  $C_L$ - $\alpha$  graph when a harmonic floater pitch moment is applied. It has been proven that an increased time constant  $\tau$  produces a higher slope of the lift coefficient  $C_L$  over the angle of attack  $\alpha$  which is evidently demonstrated in Figure 7.

This lift curve slope trend with an increasing time constant  $\tau$  in the region where the flow is partially separated is not physically accurate. A slope higher than the static curve implies that the model does not consider the Theodorsen effect. This occurs because Stig Øye's dynamic stall model does not take into account the shed vorticity from the airfoil trailing

edge which is modeled by Theodorsen's analytical function. This effect is captured by the Beddoes-Leishman dynamic stall  
 420 model (Leishman et al., 1986) which was linearized in the form of a state-space model by Hansen et al. (2004b). We opted  
 for the Stig Øye dynamic stall model instead because it only requires one aerodynamic stall variable per blade compared to  
 multiple variables for the Beddoes-Leishman state-space model (Hansen et al., 2004b). This alleviates the implementation and  
 linearization of the dynamic stall model equations in the system state-space formulation.

#### 4 Hill's method of infinite determinants

425 The damping of dynamic systems is usually quantified through the eigenvalues analysis of linearized system matrices. However,  
 for the dynamic system at hand, several system matrix components are azimuthally periodic, meaning that the stability analysis  
 cannot be directly analyzed for the time varying system matrix. Hill's method is a solution that renders the system matrix to  
 become LTI so that the eigenvalues can be calculated.

##### 4.1 Aero-elastic stability within Hill's method

430 To obtain an LTI system via Hill's method, the state-space ODE from Eq. (36) is rewritten as a truncated double sided Fourier  
 series with a summation index spanning from  $j = -N$  till  $N$ , with  $N$  being the upper limit for the expansion. The Fourier  
 series expansion for the state vector  $\underline{q}$ , the time derivative vector  $\dot{\underline{q}}$ , and the linearized system matrix  $\underline{A}_L$  (Christensen and  
 Santos, 2005), which are all of dimension  $N_s$ , is respectively

$$\underline{q}(t) = \sum_{j=-N}^N \underline{q}_j(t) e^{ij\Omega t}, \quad \dot{\underline{q}}(t) = \sum_{j=-N}^N \left( (ij\Omega) \underline{q}_j(t) + \dot{\underline{q}}_j(t) \right) e^{ij\Omega t} \quad \text{and} \quad \underline{A}_L(t) = \sum_{j=-N}^N \underline{A}_{L,j} e^{ij\Omega t}, \quad (41)$$

435 where each  $\underline{A}_{L,j}$  is a constant matrix. In our model, a Fourier decomposition with  $N = 4$  suffices to create an exact description  
 of the system's periodicity.

The Fourier decomposition of the system must be doubled sided because the linearized model's system matrix  $\underline{A}_L$  is real and  
 has no imaginary component, refer to Eq. (37). To rephrase, the double sided Fourier decomposition of  $\underline{A}_L$  allows to cancel  
 out the imaginary parts that appear from the positive ( $+j\Omega$ ) and negative ( $-j\Omega$ ) harmonics. The expressions from Eq. (41) can  
 440 be inserted into the state-space ODE from Eq. (36). For the eigenvalue analysis to be applicable, the free vibration condition is  
 considered in Eq. (36) which implies that no input forcing  $\underline{F}_B$  is exerted on the system. This approach is laid out as

$$\sum_{n=-N}^N \left( \dot{\underline{q}}_n(t) + (in\Omega) \underline{q}_n \right) e^{in\Omega t} = \sum_{j=-N}^N \sum_{r=-N}^N \underline{A}_{L,j} \underline{q}_r e^{i(j+r)\Omega t}. \quad (42)$$

The expression from Eq. (42) can then be manipulated to get

$$\sum_{n=-N}^N \dot{\underline{q}}_n(t) e^{in\Omega t} = \sum_{n=-N}^N \left( -(in\Omega) \underline{q}_n + \sum_{j=n-N}^{n+N} \underline{A}_{L,j} \underline{q}_{n-j} \right) e^{in\Omega t}. \quad (43)$$

445 Since Eq. (43) must hold for any value of time  $t$ , the factor for each  $e^{in\Omega t}$  term in the summation must satisfy

$$\dot{\underline{q}}_n(t) = -(in\Omega)\underline{q}_n + \sum_{j=n-N}^{n+N} \underline{\underline{A}}_{L,j}\underline{q}_{n-j}. \quad (44)$$

Upon definition of  $\hat{\underline{q}} = [\underline{q}_{n=-N}^T, \dots, \underline{q}_{n=0}^T, \dots, \underline{q}_{n=N}^T]^T$ , Eq. (44) is recast into a hyper-matrix formulation by varying the index  $n$  from from  $-N$  till  $N$  to represent a state-space equation for different harmonics  $\underline{q}_n$  of the response  $\underline{q}$ ,

$$\underbrace{\begin{bmatrix} \vdots \\ \dot{\underline{q}}_{n=-1} \\ \dot{\underline{q}}_{n=0} \\ \dot{\underline{q}}_{n=+1} \\ \vdots \end{bmatrix}}_{\hat{\underline{q}}} = \underbrace{\begin{bmatrix} \ddots & \vdots & \vdots & \vdots & \ddots \\ \dots & \underline{\underline{A}}_{L,0} + i\Omega\underline{I} & \underline{\underline{A}}_{L,-1} & \underline{\underline{A}}_{L,-2} & \dots \\ \dots & \underline{\underline{A}}_{L,1} & \underline{\underline{A}}_{L,0} & \underline{\underline{A}}_{L,-1} & \dots \\ \dots & \underline{\underline{A}}_{L,2} & \underline{\underline{A}}_{L,1} & \underline{\underline{A}}_{L,0} - i\Omega\underline{I} & \dots \\ \ddots & \vdots & \vdots & \vdots & \ddots \end{bmatrix}}_{\hat{\underline{\underline{A}}}} \underbrace{\begin{bmatrix} \vdots \\ \underline{q}_{n=-1} \\ \underline{q}_{n=0} \\ \underline{q}_{n=1} \\ \vdots \end{bmatrix}}_{\underline{\hat{q}}}. \quad (45)$$

450 It can be seen in Eq. (45) that for a truncation with the expansion upper limit  $N$ , the number of harmonic matrices  $\underline{\underline{A}}_{L,j}$  required to be computed spans from  $j = -2N$  till  $j = 2N$ . The hyper-matrix  $\hat{\underline{\underline{A}}}$  that emerges is a Toeplitz matrix of dimension  $N_s \cdot (2N + 1)$  with an additional contribution on the diagonal terms due to the rotational speed  $\Omega$ . Since  $\hat{\underline{\underline{A}}}$  is a constant matrix it allows to describe an LTI system and thus to compute its eigenvalues and eigenvectors.

## 4.2 Hill's eigenvalue problem

455 Put differently, Eq. (45) translates to  $\hat{\underline{q}} = \hat{\underline{\underline{A}}}\hat{\underline{q}}$  where the stability of the LTI system is determined through the eigenvalues of  $\hat{\underline{\underline{A}}}$ . Consequently, the eigenvalue problem to solve for the hyper-matrix  $\hat{\underline{\underline{A}}}$  (Skjoldan, 2009) is expressed as

$$\left( \underbrace{\begin{bmatrix} \ddots & \vdots & \vdots & \vdots & \ddots \\ \dots & \underline{\underline{A}}_{L,0} + i\Omega\underline{I} & \underline{\underline{A}}_{L,-1} & \underline{\underline{A}}_{L,-2} & \dots \\ \dots & \underline{\underline{A}}_{L,1} & \underline{\underline{A}}_{L,0} & \underline{\underline{A}}_{L,-1} & \dots \\ \dots & \underline{\underline{A}}_{L,2} & \underline{\underline{A}}_{L,1} & \underline{\underline{A}}_{L,0} - i\Omega\underline{I} & \dots \\ \ddots & \vdots & \vdots & \vdots & \ddots \end{bmatrix}}_{\hat{\underline{\underline{A}}}} - \lambda_{k,m}\hat{\underline{I}} \right) \underbrace{\begin{bmatrix} \vdots \\ \hat{\underline{v}}_{k,m,n=-1} \\ \hat{\underline{v}}_{k,m,n=0} \\ \hat{\underline{v}}_{k,m,n=1} \\ \vdots \end{bmatrix}}_{\hat{\underline{v}}_{k,m}} = \hat{\underline{0}}. \quad (46)$$

The eigenvalues  $\lambda_{k,m}$  have an index  $k$  that is related to a physical mode which can range from the first to the last state number,  $k = 1 \dots N_s$ . The index  $m$  refers to the periodic frequencies valid for a  $k^{th}$  eigenvalue  $\lambda_{k,m}$ , and with a Fourier series truncation  
460 consideration, it ranges just like index  $n$  from  $-N$  till  $N$ . Yet, if no truncation is considered in Eq. (46), each one of those physical modes is associated with an infinite number of eigenvalues due to the infinite nature of the hyper-matrix  $\hat{\underline{\underline{A}}}$ . In that case, solving the eigenvalue problem for an eigenvalue  $\lambda_{k,j+m}$  in Eq. (46) leads to the same matrix  $\hat{\underline{\underline{A}}}$  to solve as for  $\lambda_{k,j}$  with

the addition of  $\underline{\hat{I}}m\Omega$  with shifted eigenvectors accordingly. In short, the eigenvalue is established as

$$\lambda_{k,m} = \sigma_k + i \underbrace{(\omega_{p,k} + m\Omega)}_{\omega_{k,m}} = \underbrace{\lambda_{k,0}}_{\lambda_k} + im\Omega, \quad (47)$$

465 where the eigenvalue's real part is the modal damping coefficient  $\sigma_k$  which is negative for stable modes, whereas its imaginary part is the damped frequency  $\omega_{k,m}$ . The damped frequency  $\omega_{k,m}$  is made of a principal ( $p$ ) frequency  $\omega_{p,k}$  shifted by an integer  $m$  multiple of  $i\Omega$ . Furthermore, the redundancy of eigenvectors  $\hat{v}_{k,m}$  can be proven. If we take the middle row from Eq. (46) linked to  $n = 0$  and describe that subset of equations for  $\lambda_{k,m=0}$ , we get

$$\dots + \underline{\underline{A}}_{L,2} \hat{v}_{k,0,-2} + \underline{\underline{A}}_{L,1} \hat{v}_{k,0,-1} + \left( \underline{\underline{A}}_{L,0} - \lambda_{k,0} \underline{\underline{I}} \right) \hat{v}_{k,0,0} + \underline{\underline{A}}_{L,-1} \hat{v}_{k,0,1} + \underline{\underline{A}}_{L,-2} \hat{v}_{k,0,2} + \dots = \underline{\underline{0}}. \quad (48)$$

470 Then we can apply the same thought to the row associated to  $n = 1$  and thus obtain the following subset of equations for  $\lambda_{k,m=1}$  instead,

$$\dots + \underline{\underline{A}}_{L,2} \hat{v}_{k,1,-1} + \underline{\underline{A}}_{L,1} \hat{v}_{k,1,0} + \left( \underline{\underline{A}}_{L,0} - \underbrace{(\lambda_{k,1} - i\Omega)}_{\lambda_{k,0}} \underline{\underline{I}} \right) \hat{v}_{k,1,1} + \underline{\underline{A}}_{L,-1} \hat{v}_{k,1,2} + \underline{\underline{A}}_{L,-2} \hat{v}_{k,1,3} \dots = \underline{\underline{0}}. \quad (49)$$

By comparison of Eqs. (48) and (49), it can be reasoned that  $\hat{v}_{k,0,j} = \hat{v}_{k,m,j+m}$ . It ensues that solving the basis eigenvector  $\hat{v}_{k,0}$  for  $\lambda_{k,0}$  is sufficient to describe the eigenvectors of the system. The eigenvector  $\hat{v}_{k,0}$  is the same as any other eigenvector  $\hat{v}_{k,m}$  475 linked to  $\lambda_{k,m}$ , but it is shifted in values in the positive  $n$  direction by  $m \cdot N_s$  and upwards in frequency by  $m\Omega$ . The relations from Eqs. (46) and (47) for the infinite hyper-matrix  $\underline{\underline{A}}$  are in practice affected by the truncation from the Fourier decomposition which is applied to the system. After truncation, the full eigenvectors matrix that is associated to all the eigenvalues  $\lambda_{k,m}$  is  $\hat{V}_{(N_s \cdot (2N+1)) \times (N_s \cdot (2N+1))}$ . Therefore a portion of the full eigenvector matrix  $\hat{V}_{(N_s \cdot (2N+1)) \times (N_s \cdot (2N+1))}$  is identified as  $\hat{V}_{(N_s \cdot (2N+1)) \times N_s}$  and it is composed of non-redundant hyper-eigenvectors  $\hat{v}_{k,m=0}$  that are linked to the principal eigenvalues 480  $\lambda_{k,m=0}$ . Inside  $\hat{V}_{(N_s \cdot (2N+1)) \times N_s}$ , each column of index  $k$  is composed of individual eigenvectors  $\hat{v}_{k,m=0,n}$  (see Eq. (46)) of length  $N_s = 11$  for a three-bladed rotor.

### 4.3 Principal eigenvalues selection method

Solving the eigenvalue problem from Eq. (46) for Hill's constant hyper-matrix  $\underline{\underline{A}}$  (LTI system) generates the multiple identical eigenvectors  $\hat{v}_{k,m}$  with damping values  $\sigma_k$ . These identical modes have shifted eigenfrequencies  $\omega_{k,m}$  by an integer  $m$  of  $\Omega$  485 for each  $k^{th}$  state, refer to Eq. (47). Among the redundant modes, it is essential to select the one for each  $k^{th}$  state with the most significant eigenvalue and corresponding frequency  $\omega_{p,k}$ .

A principal damped frequency can be defined as the median in the set of all values obtained, which has been validated by Xu and Gasch (1995) for a three-bladed wind turbine rotor, by Christensen and Santos (2005) for a general four-bladed rotor, and by Lazarus and Thomas (2010) for a forced hardening Duffing oscillator. This procedure translates to selecting 490 the eigenvalues that are nearest in value to the ones of matrix  $\underline{\underline{A}}_{L,0}$  labeled as  $\lambda_{k,\underline{\underline{A}}_{L,0}}$  for each  $k^{th}$  state. The eigenvalue selection for each  $k^{th}$  state is associated to a given optimal frequency shift  $\hat{m}\Omega$  that allows to obtain the rightful principal

frequency as  $\lambda_{k,\hat{m}} = \min \left( |\lambda_{k,m} - \lambda_{k,\underline{A}_{L,0}}| \right)$ , and then the optimal eigenvalue for the  $k^{th}$  state is eliminated from the selection pool of candidate values. This straightforward selection technique is applicable when  $\underline{A}_{L,0}$  has matrix components that are considerably larger in absolute value in comparison with the other higher harmonics matrices. The principal eigenvalues and eigenvectors are associated to an index  $m = 0$  in the eigenvalue identity from Eq. (47), and there are as many of them as there are number of states.

This technique of principal eigenvalue selection has also been employed by Genta (1988) for the stability analysis of a non-axisymmetric rotor and stator modeled via Timoshenko beam elements. The Campbell diagram was plotted by using the "zero order" and higher order estimations of the eigenvalues by solving the eigenvalue problem of the EOM respectively with the zeroth and higher order harmonic matrices (Genta, 1988). More recently, a more elaborate method has been introduced by Hansen (2016) for the identification of the principal eigenvalues. It consists of eliminating from the eigenmode solutions half of the largest eigenvectors with higher order harmonic components, and then selecting the principal solutions with the largest mean or zeroth harmonic components so that they are not centered around the mean value. Despite the proven functionality of that method for two and three-bladed wind turbines (Hansen, 2016), we have demonstrated in our previous stability analysis work (Pamfil et al., 2024) the reliability of our more direct and simple principal eigenvalue selection methodology to deal with the indeterminacy problem.

## 5 Floquet's theory

Hill's method has been shown to be capable of constructing an LTI system that can be used for stability analysis. Nonetheless, for cross-validation purposes, it is relevant to utilize another method to perform the modal analysis. As another option, Floquet's theory is commonly used too for the objective of rendering the periodic system to become LTI. Floquet's (or the Floquet–Liapunov) theory has notably been employed by Frulla (2000) to obtain accurately the stability limit curves for the EOM of a symmetrical four-bladed rotor and an unsymmetrical two-bladed one, both subjected to a constant rotational speed  $\Omega$ . The application of Floquet's theory for wind turbines has been further investigated by Skjoldan (2011), Bottasso and Cacciola (2015), and Riva (2017). Regarding the scope of their work, Bottasso and Cacciola (2015), and Riva (2017) emphasized in tuning the principal natural frequencies selection so that they are more representative of the system.

### 5.1 The original and transformed states with corresponding ODEs

As a starting point, Floquet's theory introduces the transform matrix  $\underline{P}(t)$ , also referred to as the Lyapunov-Floquet (L-F)  $\underline{L}(t)$  transform (Filsoof et al., 2021). By definition, the inverse of the  $\underline{P}(t)$  transform multiplies an original state  $\underline{y}(t)$  to obtain a transformed state  $\underline{z}(t)$ , i.e.  $\underline{z}(t) = \underline{P}(t)^{-1}\underline{y}(t)$ . The  $\underline{P}(t)$  transform is periodic meaning that  $\underline{P}(t+T) = \underline{P}(t)$ , which also implies that  $\underline{P}(0) = \underline{P}(T)$ . The ODE from Eq. (36) is linked to the original state  $\underline{y}$  and it is here governed solely by the linear model's time dependent state-space matrix  $\underline{A}_L(t)$  with no added input or forcing (free vibration condition),

$$\underbrace{\dot{\underline{P}}(t)\underline{z} + \underline{P}(t)\dot{\underline{z}}}_{\dot{\underline{y}}} = \underline{A}_L(t)\underbrace{\underline{P}(t)\underline{z}}_{\underline{y}}. \quad (50)$$

A new LTI ODE is redefined for the transformed state  $\underline{z}$  by isolating its time derivative  $\dot{\underline{z}}$ . The resulting equation includes the Floquet factor constant matrix  $\underline{R}$  (Skjoldan and Hansen, 2009),

$$525 \quad \dot{\underline{z}} = \underbrace{\underline{P}^{-1}(t) \left( \underline{A}_L(t) \underline{P}(t) - \dot{\underline{P}}(t) \right)}_{\underline{R}} \underline{z}. \quad (51)$$

If the dynamic system was represented for the transformed state  $\underline{z}$  in a different coordinate system than the original state  $\underline{y}$ , and if the state-space matrix  $\underline{A}_L(t)$  would be expressed in the same coordinate system as  $\underline{y}$ , then  $\underline{P}^{-1}(t)$  could potentially be the Coleman transform. In that case, the Coleman transform would be the exact representation of the transform  $\underline{P}^{-1}(t)$  for a dynamic system that is isotropic with a rotor having three blades or more. However, if the dynamic system is not entirely  
530 isotropic, then the Coleman transform is an approximation of the transform  $\underline{P}^{-1}(t)$  and it does not generate a constant matrix  $\underline{R}$  with a complete cancellation of periodic terms in  $\underline{A}_L(t)$ .

## 5.2 The state transition matrix

The LTI ODE in Eq. (51) suggests that the transformed state solution  $\underline{z}(t)$  can be found given its initial condition  $\underline{z}(0)$  if the Floquet factor  $\underline{R}$  is known,  $\underline{z}(t) = e^{\underline{R}t} \underline{z}(0)$ . In other words, the matrix multiplying the initial condition to obtain the solution is  
535 called a state transition matrix, which means that  $\underline{\Phi}_R(t, 0) = e^{\underline{R}t}$ . Equivalently, the state transition matrix  $\underline{\Phi}_A(t, 0)$  enables the calculation of the original state  $\underline{y}(t)$  in the following manner:

$$\underline{y}(t) = \underline{P}(t) \underline{\Phi}_R(t, 0) \underline{z}(0) = \underbrace{\underline{P}(t) e^{\underline{R}t} \underline{P}^{-1}(0)}_{\underline{\Phi}_A(t, 0)} \underline{y}(0). \quad (52)$$

$\underline{P}(0)$  is set as equal to the identity matrix  $\underline{I}$ , which ensures that  $\underline{z}(0) = \underline{y}(0)$  according to the original state definition,  $\underline{y}(t) = \underline{P}(t) \underline{z}(t)$ . This condition must be fulfilled because it is not intended to have an actual change of variables frame through  $\underline{P}(t)$ .  
540 Knowing the system's periodicity for the transform  $\underline{P}(t)$ , i.e.  $\underline{P}(0) = \underline{P}(T) = \underline{I}$ , the state transition matrices in Eq. (52) are the same after a duration of a period  $T$  has passed, leading to  $\underline{\Phi}_A(T, 0) = \underline{\Phi}_R(T, 0)$ . In order to solve either state transition matrix, a corresponding ODE is found. For instance, the transition matrix  $\underline{\Phi}_A(t, 0)$  ODE obtained for the original state  $\underline{y}$  (Bottasso and Cacciola, 2015) involves the system matrix  $\underline{A}_L(t)$ ,

$$\dot{\underline{\Phi}}_A(t, 0) = \underline{A}_L(t) \underline{\Phi}_A(t, 0), \quad (53)$$

545 whereas the state transition matrix  $\underline{\Phi}_R(t, 0)$  ODE involves instead the constant matrix  $\underline{R}$  and follows the same principle,  $\dot{\underline{\Phi}}_R(t, 0) = \underline{R} \underline{\Phi}_R(t, 0)$ . The state transition  $\underline{\Phi}_A(T, 0)$  matrix is also referred to as the monodromy matrix  $\underline{C}$  and it is equated to  $\underline{C} = e^{\underline{R}T}$ . The monodromy matrix is solved using Eq. (53) through as many decay tests simulations for the duration of a period  $T$  as there are states (Skjoldan, 2011). Each one of those simulations is characterized by an initial unit perturbation for one state at a time. The simulations initial condition is a column vector taken from  $\underline{\Phi}_A(0, 0) = \underline{I}$  that is utilized to fill the  
550 corresponding column of  $\underline{\Phi}_A(T, 0)$ . The numerous simulations executed to solve the monodromy matrix by a Runge-Kutta time-integration scheme can be computationally expensive in terms of duration especially at lower rotational speeds  $\Omega$  which have longer periods  $T$ .



### 5.3 The diagonalization of the monodromy matrix and the constant Floquet factor matrix with eigenmodes

Once the state transition matrix  $\underline{\Phi}_A(T, 0)$  or monodromy matrix  $\underline{C}$  has been calculated, it is diagonalized as  $\underline{C} = \underline{V} \underline{\rho} \underline{V}^{-1}$ .  
 555 To do so, the eigenvalue problem for  $\underline{C}$  (Riva, 2017) is solved to determine the eigenvectors basis matrix  $\underline{V}$ , where columns are eigenvectors, and to find the diagonal matrix of eigenvalues,  $\underline{\rho} = \text{diag}(\rho_k)$ . The eigenvalues of the monodromy matrix  $\rho_k$  are also referred to as the characteristic or Floquet multipliers (Skjoldan, 2011). In addition, the eigenvectors are the same irrespective of the infinite amount of valid eigenvalues characterized by a given frequency shift difference of  $m\Omega$ . In regard to the Floquet factor  $\underline{R}$ , it is diagonalized with the same eigenvector basis matrix  $\underline{V}$  as for  $\underline{C}$ , but with a modified diagonal matrix  
 560 of eigenvalues,  $\underline{\lambda} = \text{diag}(\lambda_k)$  (Riva, 2017):

$$\underline{R} = \frac{1}{T} \ln(\underline{C}) = \underline{V} \frac{1}{T} \ln(\underline{\rho}) \underline{V}^{-1} = \underline{V} \underline{\lambda} \underline{V}^{-1}. \quad (54)$$

Furthermore, the eigenvalues  $\lambda_k$  are affected by the periodicity of the system in the following way (Bauchau and Nikishkov, 2001):

$$\lambda_{k,m} = \lambda_k + i m \Omega = \sigma_k + i \underbrace{(\omega_{p,k} + m \Omega)}_{\omega_{k,m}} = \frac{1}{T} \ln(|\rho_k|) + i \left( \frac{1}{T} \arctan \left( \frac{\Im(\rho_k)}{\Re(\rho_k)} \right) + m \Omega \right). \quad (55)$$

565 This eigenvalue  $\lambda_{k,m}$  definition is synonymous with the one in Eq. (47) that is associated to Hill's method (Skjoldan, 2011). The real component of  $\lambda_{k,m}$ , i.e.  $\sigma_k$ , is unique to each  $k^{\text{th}}$  state. In contrast, there is a multiplicity per state for the imaginary component of  $\lambda_{k,m}$  being the frequencies  $\omega_{k,m}$ . Analogously to Hill's method, a principal ( $p$ ) frequency  $\omega_{p,k}$  is linked to a given state of index  $k$  and can be shifted by  $m\Omega$ , as indicated in Eq. (55). To rephrase, due to the system's periodicity, there are an infinite amount of valid eigenvalues solutions  $\lambda_{k,m}$  for each  $k^{\text{th}}$  state with any integer  $m$  selected. For the sake of precision,  
 570 it is imperative to determine an optimal frequency shift of  $\hat{m}\Omega$  from the value obtained by diagonalizing the monodromy matrix. Thus, more suitable eigenvalues noted  $\hat{\lambda}_{k,\hat{m}} = \lambda_k + i \hat{m}\Omega$  serve to recalculate an adjusted diagonalized Floquet factor, i.e.  $\hat{\underline{R}} = \underline{V} \hat{\underline{\lambda}} \underline{V}^{-1}$ .

### 5.4 Selecting principal eigenvalues through the participation factor

It is left to determine a technique for the selection of the most representative or principal eigenvalues  $\lambda_{k,m}$  considering their  
 575 multiplicity. This redundancy problem is resolved by quantifying instead a participation factor of modes  $\phi_{k,m}$  that is associated to each eigenvalue  $\lambda_{k,m}$ . The notion of a participation factor being used for the principal frequency selection among other candidates was first elaborated by Bottasso and Cacciola (2015), but it was more thoroughly investigated by Riva (2017) afterwards. To be able to obtain the participation factor from the state transition matrix  $\underline{\phi}_A(t, 0)$  definition, the projected matrix of the eigenvector basis  $\underline{\Xi}(t)$  (Riva et al., 2016),  $\underline{\Xi}(t) = \underline{P}(t) \underline{V}$  can be used. The matrix  $\underline{\Xi}(0)$  is the eigenvector basis  $\underline{V}$  since it  
 580 has been shown earlier that  $\underline{P}(0) = \underline{I}$  (Bottasso and Cacciola, 2015). These new expressions are included in the reformulation of the transition matrix  $\underline{\phi}_A(t, 0)$  from Eq. (52) after substituting  $\underline{R}$  with its diagonalized representation from Eq. (54):

$$\underline{\Phi}_A(t, 0) = \underline{P}(t) \underline{V} e^{\underline{\lambda} t} \underline{V}^{-1} \underline{P}^{-1}(0) = \underline{\Xi}(t) e^{\underline{\lambda} t} (\underline{P}(0) \underline{V})^{-1} = \sum_{k=1}^{N_s} \left[ \dots \quad \underline{0}_{N_s \times 1} \quad \underline{\Xi}_{(:,k)} e^{\lambda_k t} \quad \underline{0}_{N_s \times 1} \quad \dots \right] \underline{\Xi}^{-1}(0). \quad (56)$$

Given that  $\underline{\Phi}_A(t, 0)$  has been solved for each time step  $t$ ,  $\underline{P}(t)$  is isolated in Eq. (56) so that it can be used to compute  $\underline{\Xi}(t)$ ,  $\underline{P}(t) = \underline{\Phi}_A(t, 0)\underline{V}e^{-\lambda t}\underline{V}^{-1}$ . Using the identity of  $\underline{P}(t) = \underline{\Phi}_A(t, 0)\underline{V}e^{-\lambda t}\underline{V}^{-1}$  in combination with the definition of the eigenvector basis matrix  $\underline{\Xi}(t)$ , the indeterminacy problem of the modal frequencies has also been resolved by Skjoldan and Hansen (2009). That has been achieved through a Fourier expansion of the time varying mode shape vector  $\underline{\psi}_k(t) = \text{col}_k(\underline{\Xi}(t))$  that is the  $k^{\text{th}}$  column ( $\text{col}_k$ ) extracted from the projected matrix of the eigenvector basis  $\underline{\Xi}(t)$ ,

$$\underline{\psi}_k(t) = \text{col}_k(\underline{P}(t)\underline{V}) = \text{col}_k(\underline{\Phi}_A(t, 0)\underline{V}e^{-\lambda t}) = \underline{\Phi}_A(t, 0)\text{col}_k(\underline{V}e^{-\lambda t}) = \underline{\Phi}_A(t, 0)\underline{v}_k e^{-(\lambda_k + im\Omega)t} = \underline{\psi}_{p,k}(t)e^{-im\Omega t}. \quad (57)$$

The  $k^{\text{th}}$  principal periodic mode  $\underline{\psi}_{p,k}(t) = \underline{\Phi}_A(t, 0)\underline{v}_k e^{-\lambda_k t}$  from Eq. (57) is dependent on the constant eigenvector  $\underline{v}_k$  extracted from the eigenvector basis  $\underline{V}$ . A truncated double sided Fourier expansion of  $\underline{\psi}_{p,k}$ ,

$$\underline{\psi}_{p,k}(t) = \sum_{m=-N}^N \underline{\psi}_{p,k,m}(\omega_{k,m})e^{im\Omega t}, \quad (58)$$

allows to pick the optimal frequency shift  $\hat{m}\Omega$  among the Fourier vector coefficients based on the maximal Euclidian norm, i.e.  $\|\underline{\Psi}_{p,k,\hat{m}}(\omega_{k,\hat{m}})\|_2 = \max(\|\underline{\Psi}_{p,k,m}(\omega_{k,m})\|_2)$ . This selection method fails to determine the participation of  $\|\underline{\Psi}_{p,k,\hat{m}}(\omega_{k,\hat{m}})\|_2$  compared to other candidate vectors. In order to improve the frequency shift selection criteria, we need to find a definition of the participation factor  $\phi_{k,m}$  by continuing from Eq. (56). One can then bring into the picture the matrix  $\underline{I}_{k,k}$  which is null except for a unit value on the matrix diagonal component located on the  $k^{\text{th}}$  row and column (Bottasso and Cacciola, 2015). This gives the simplified expression of  $\underline{\Phi}_A(t, 0) = \sum_{k=1}^{N_s} \underline{\Xi}(t)\underline{I}_{k,k}\underline{\Xi}^{-1}(0)e^{\lambda_k t}$ . After some additional manipulations of Eq. (56), another identity for  $\underline{\Phi}_A(t, 0)$  can be deduced (Riva et al., 2016):

$$\sum_{k=1}^{N_s} \begin{bmatrix} \cdots & \mathbf{0}_{N_s \times 1} & \underline{\Xi}(:,k) & \mathbf{0}_{N_s \times 1} & \cdots \end{bmatrix} \begin{bmatrix} \vdots \\ \mathbf{0}_{1 \times N_s} \\ (\underline{\Xi}^{-1}(0))_{(k,:)} \\ \mathbf{0}_{1 \times N_s} \\ \vdots \end{bmatrix} e^{\lambda_k t} = \sum_{k=1}^{N_s} \underbrace{\begin{bmatrix} \underline{\Xi}(1,k) \\ \vdots \\ \underline{\Xi}(N_s,k) \end{bmatrix}}_{\underline{\Psi}_k(t)} \underbrace{\left[ (\underline{\Xi}^{-1}(0))_{(k,1)} \quad \cdots \quad (\underline{\Xi}^{-1}(0))_{(k,N_s)} \right]}_{\underline{L}_k(0)^T} e^{\lambda_k t}. \quad (59)$$

This introduces in Eq. (59) the  $k^{\text{th}}$  row ( $\text{row}_k$ ) for the inverse of the eigenvector basis  $\underline{\Xi}(0)^{-1} = \underline{V}^{-1}$ , which results in  $\underline{L}_k(0)^T = \text{row}_k(\underline{\Xi}(0)^{-1})$ . The state transition matrix can be written afterwards as a Fourier decomposition,  $\underline{\Phi}_A(t, 0) = \sum_{k=1}^{N_s} \sum_{m=-N}^N \underline{Z}_{k,m}(\omega_{k,m})e^{(\lambda_k + im\Omega)t}$  where  $\underline{Z}_k(t) = \underline{\Xi}(t)\underline{I}_{k,k}\underline{\Xi}^{-1}(0) = \underline{\Psi}_k(t)\underline{L}_k(0)^T$  is transformed from the time to the frequency domain,  $\underline{Z}_{k,m}(\omega_{k,m})$ , through a double sided Fourier series expansion. In light of this, the matrix  $\underline{Z}_{k,m}(\omega_{k,m})$  describes the contribution in the total value of  $\underline{\Phi}_A(t, 0)$  which quantifies the participation factor  $\phi_{k,m}$ . The participation factor can be evaluated through the Frobenius norm of  $\|\underline{Z}_{k,m}(\omega_{k,m})\|_F$  (Riva, 2017):

$$\phi_{k,m} = \frac{\|\underline{\Xi}_{k,m}(\omega_{k,m})\underline{I}_{k,k}\underline{\Xi}^{-1}(0)\|_F}{\sum_{m=-N}^N \|\underline{\Xi}_{k,m}(\omega_{k,m})\underline{I}_{k,k}\underline{\Xi}^{-1}(0)\|_F} = \frac{\|\underline{\Psi}_{k,m}(\omega_{k,m})\|_2 \|\underline{L}_k^T(0)\|_2}{\sum_{m=-N}^N \|\underline{\Psi}_{k,m}(\omega_{k,m})\|_2 \|\underline{L}_k^T(0)\|_2} = \frac{\|\underline{\Psi}_{k,m}(\omega_{k,m})\|_2}{\sum_{m=-N}^N \|\underline{\Psi}_{k,m}(\omega_{k,m})\|_2}. \quad (60)$$

After a set of participation factors of index  $m$  have been calculated for each  $k^{th}$  state, the most appropriate principal eigenvalue is selected. It is crucial to point out that a much greater number of frequency shifts candidates should be covered at lower rotational speeds. When nearing low rotational speeds, the initial frequencies estimates obtained from the monodromy matrix for the blades motion amplitudes  $a_l$  DOFs are suddenly too low and closer to the damped frequency pertaining to the floater pitch angle  $\xi_5$  DOF. The selection criteria is to pick for each  $k^{th}$  eigenvalue, the frequency shift  $\hat{m}\Omega$  that is associated to the maximum participation factor  $\hat{\phi}_{k,\hat{m}} = \max(\phi_{k,m})$  among the tested set of candidate values (Riva et al., 2016).

## 6 Coleman Transform

An aero-elastic stability analysis is usually carried out by using the Coleman transform which modifies the DOFs' frame and it suffices in this case to render the system to become LTI. We utilize it here as our benchmark model to validate Hill's and Floquet's results from the previous sections. The Coleman transform expresses the blades deflections amplitudes  $a_l$  from a rotational frame of reference to a fixed non-rotational (NR) frame as  $a_0$ ,  $a_c$  and  $a_s$  amplitudes. To clarify this multi-blade set of variables, the three fixed rotor motions in that frame can be visualized in Figure 8.

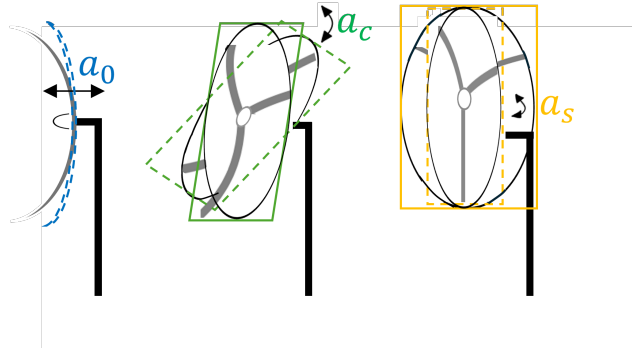

**Figure 8.** The flap-wise three motions of the blades expressed as NR variables are the blades collective flap-wise ( $a_0$ ), the rotor fore-aft tilting ( $a_c$ ) and rotor yawing ( $a_s$ ) motion amplitudes.

The Coleman matrix  $\underline{T}^{-1}$  transforms the four structural degrees of freedom from the rotational frame,  $\underline{x} = [\xi_5, a_1, a_2, a_3]^T$ , to the non-rotational one,  $\underline{x}_{NR} = [\xi_5, a_0, a_c, a_s]^T$ , and its inverse  $\underline{T}$  provides the opposite transform:

$$\begin{bmatrix} \xi_5 \\ a_0(t) \\ a_c(t) \\ a_s(t) \end{bmatrix} = \begin{bmatrix} 1 \\ \underbrace{\begin{bmatrix} 1/3 & 1/3 & 1/3 \\ 2/3 \cos \psi_1 & 2/3 \cos \psi_2 & 2/3 \cos \psi_3 \\ 2/3 \sin \psi_1 & 2/3 \sin \psi_2 & 2/3 \sin \psi_3 \end{bmatrix}}_{\underline{B}_{3 \times 3}^{-1}} \end{bmatrix} \begin{bmatrix} \xi_5 \\ a_1(t) \\ a_2(t) \\ a_3(t) \end{bmatrix} \quad \text{and} \quad \begin{bmatrix} \xi_5 \\ a_1(t) \\ a_2(t) \\ a_3(t) \end{bmatrix} = \begin{bmatrix} 1 \\ \underbrace{\begin{bmatrix} 1 & \cos \psi_1 & \sin \psi_1 \\ 1 & \cos \psi_2 & \sin \psi_2 \\ 1 & \cos \psi_3 & \sin \psi_3 \end{bmatrix}}_{\underline{B}_{3 \times 3}} \end{bmatrix} \begin{bmatrix} \xi_5 \\ a_0(t) \\ a_c(t) \\ a_s(t) \end{bmatrix}. \quad (61)$$

Put differently, Eq. (61) translates to  $\underline{x}_{NR} = \underline{T}^{-1} \underline{x}$  and  $\underline{\dot{x}} = \underline{T} \underline{\dot{x}}_{NR}$ . It means that we transform the original four structural degrees of freedom vector in the non-rotational basis, by first excluding the three  $f_{s,l}$  aerodynamic variables associated with the dynamic stall model implementation. The equation of motion for the linear model from Eq. (26) is derived in the NR frame  
625 by multiplying both left and right hand side by  $\underline{T}^{-1}$  and by utilizing  $\underline{T}$  and  $\underline{T}^{-1}$  to express the vector  $\underline{x}$  and its time derivatives in the same frame:

$$\underline{T}^{-1} \underline{M}_S \underbrace{\left( \underline{\ddot{T}} \underline{x}_{NR} + 2 \underline{\dot{T}} \underline{\dot{x}}_{NR} + \underline{T} \underline{\ddot{x}}_{NR} \right)}_{\underline{\ddot{x}}} + \underline{T}^{-1} \left( \underline{C}_S + \underline{C}_A \right) \underbrace{\left( \underline{\dot{T}} \underline{x}_{NR} + \underline{T} \underline{\dot{x}}_{NR} \right)}_{\underline{\dot{x}}} + \underline{T}^{-1} \underline{K}_S \underbrace{\left( \underline{T} \underline{x}_{NR} \right)}_{\underline{x}} = \underbrace{\underline{T}^{-1} \underline{F}_L}_{\underline{F}_{NR}}. \quad (62)$$

Here the forcing vector is set to be null due to the free vibration condition considered, i.e.  $\underline{F}_L = \underline{F}_{NR} = \underline{0}$ . From Eq. (62), the equation of motion in the non-rotational frame can be worked out by grouping together the matrices contributions that multiply  
630 individually the acceleration, velocity and displacement vectors that are specified in the same frame too:

$$\underbrace{\left( \underline{T}^{-1} \underline{M}_S \underline{T} \right)}_{\underline{M}_{NR}} \underline{\ddot{x}}_{NR} + \underbrace{\left( 2 \underline{T}^{-1} \underline{M}_S \underline{\dot{T}} + \underline{T}^{-1} \left( \underline{C}_S + \underline{C}_A \right) \underline{T} \right)}_{\underline{C}_{NR}} \underline{\dot{x}}_{NR} + \underbrace{\left( \underline{T}^{-1} \underline{M}_S \underline{\ddot{T}} + \underline{T}^{-1} \left( \underline{C}_S + \underline{C}_A \right) \underline{\dot{T}} + \underline{T}^{-1} \underline{K}_S \underline{T} \right)}_{\underline{K}_{NR}} \underline{x}_{NR} = \underline{0}. \quad (63)$$

All the components in Eq. (63), including the mass, stiffness and damping matrices, are now represented as non-rotational variables. Thereafter, the contribution of the additional three aerodynamic DOFs  $f_{s,l}$  and the terms related to them need to be defined as non-rotational variables too and taken into account into the system matrix  $\underline{A}_{L,NR}$ . The state vector  $\underline{q}$  transformed in  
635 the NR frame is  $\underline{q}_{NR} = [\underline{x}_{4 \times 1, NR}^T, \underline{\dot{x}}_{4 \times 1, NR}^T, f_{s,0}, f_{s,c}, f_{s,s}]^T$ , and it has a length of integer  $N_s$ . For instance, the system matrix  $\underline{A}_{f_s}$  is the first order ODE's Jacobian matrix for  $f_s$ , i.e.  $\underline{A}_{f_s} = [\partial \dot{f}_{s,i} / \partial f_{s,j}]$ . The state-space ODE for the transformed state vector  $\underline{q}_{f_s, NR} = [f_{s,0}, f_{s,c}, f_{s,s}]^T$  is  $\dot{\underline{q}}_{f_s, NR} = \underline{A}_{f_s, NR} \underline{q}_{f_s, NR}$ , and the matrix  $\underline{A}_{f_s, NR}$  is developed after some manipulations starting with the expression  $\underline{q}_{f_s} = \underline{B} \underline{q}_{f_s, NR}$ . The resulting system matrix  $\underline{A}_{L, NR}$  is defined by the EOM that is described in the NR frame and by other transformed Jacobian matrices that are inserted,

$$\underline{A}_{L, NR} = \begin{bmatrix} \begin{bmatrix} \underline{0}_{4 \times 4} & \underline{I}_{4 \times 4} & \underline{0}_{4 \times 3} \\ \begin{bmatrix} -\underline{M}_{4 \times 4, NR}^{-1} \underline{K}_{4 \times 4, NR} & \begin{bmatrix} -\underline{M}_{4 \times 4, NR}^{-1} \underline{C}_{4 \times 4, NR} & \begin{bmatrix} \underline{T}^{-1} \underline{M}_{S, 4 \times 4}^{-1} \underline{T}_{4 \times 4} \underline{T}^{-1} \left[ \partial \underline{E}_i / \partial f_{s,j} \right]_{4 \times 3} \underline{B}_{3 \times 3} \\ \underline{M}_{4 \times 4, NR}^{-1} \end{bmatrix} \end{bmatrix} \end{bmatrix} \\ \begin{bmatrix} \underline{B}_{3 \times 3}^{-1} \left[ \partial \dot{f}_{s,i} / \partial \dot{x}_{4 \times 1, j} \right]_{3 \times 4} \underline{T}_{4 \times 4} & \begin{bmatrix} \underline{B}_{3 \times 3}^{-1} \left[ \partial \dot{f}_{s,i} / \partial \dot{x}_{4 \times 1, j} \right]_{3 \times 4} \underline{T}_{4 \times 4} & \begin{bmatrix} \underline{B}_{3 \times 3}^{-1} \left[ \partial \dot{f}_{s,i} / \partial f_{s,j} \right]_{3 \times 3} \underline{B}_{3 \times 3} - \underline{B}_{3 \times 3}^{-1} \underline{\dot{B}}_{3 \times 3} \end{bmatrix} \end{bmatrix} \end{bmatrix} \end{bmatrix}. \quad (64)$$

640

This system matrix  $\underline{A}_{L, NR}$  is time independent and can be used to calculate the eigenvalues without having to rely additionally on Hill's or Floquet's method to cancel out the periodicity of the system. This implies that the former periodicity of matrix  $\underline{A}_L(t)$  has been eliminated.

The clear disadvantage of relying on the Coleman transform system is the complexity of the Coleman transformed constant matrix  $\underline{A}_{L,NR}$  compared to the time varying counterpart  $\underline{A}_L(t)$ . Applying the Coleman transform to the parts of the matrix that define the coupling between the aerodynamic  $f_{s,l}$  states with the other structural states is not as trivial as obtaining the Coleman transformed mass  $\underline{M}_{NR}$ , damping  $\underline{C}_{NR}$  and stiffness  $\underline{K}_{NR}$  constant matrices. Nevertheless, applying the Coleman transform is a computationally efficient approach if it renders the system to become LTI, because it is not expensive in comparison to other methods.

## 650 7 Stability analysis

We now apply the stability methods on the linearized model to quantify the impact on the modal damping from the dynamic stall model's time constant  $\tau$  and rotational speed  $\Omega$ . Aerodynamic damping plays a major role in influencing the system's modal damping but also the damped frequency. The extent of that impact is thoroughly studied in this section.

Regarding the presentation of the stability analysis, the eigenvalues found in the rotational frame through Hill's and Floquet's method are compared to the ones found in the non-rotational frame using the Coleman transformed constant system matrix  $\underline{A}_{L,NR}$ .

### 7.1 Time constant $\tau$ variation eigenvalue analysis

Our first stability study consists of analyzing the evolution of eigenvalues while varying the time constant  $\tau$ . We choose an operational point of  $V_0 = 8 \text{ m s}^{-1}$  and  $\Omega = 5.73 \text{ RPM}$ . This is associated to the nominal time constant  $\tau_{nom} = 0.34 \text{ s}$ . The steady state for that operational point is located in a specific region of the lift coefficient with respect to the angle of attack. That region is characterized by a flow which is not fully attached and it precedes stall. In this particular study, the aerodynamic properties are all kept constant and only the time constant  $\tau$  is varied without any influence on other variables, such as  $V_{rel}$ .

The eigenvalues that are associated with the dynamic stall aerodynamic DOFs  $f_{s,l}$  are omitted from plots. These eigenvalues are not physically relevant because the dynamic stall DOFs  $f_{s,l}$  only serve to express the aerodynamic damping of the system, and they can be correlated to a one DOF dynamic system with a null frequency.

#### 7.1.1 Rotational frame

Eigenvalues in Figure (9) are expressed as a function of  $\tau$  in the rotational frame for the floater pitch mode denoted by PITCH and for the symmetric blade mode denoted by SYM. Hill's (marked  $\circ$ ) and Floquet's (marked  $\triangle$ ) results are matching and they are presented in terms of modal damping  $\sigma_k$ , damped frequencies  $\omega_k$  and damping ratio  $\zeta_k$  for these modes. This investigation serves to notice the impact of the eigenvalues with respect to the time constant, and to observe after what time constant value and onward the blade damped frequencies, modal damping and damping ratio have reached a plateau.

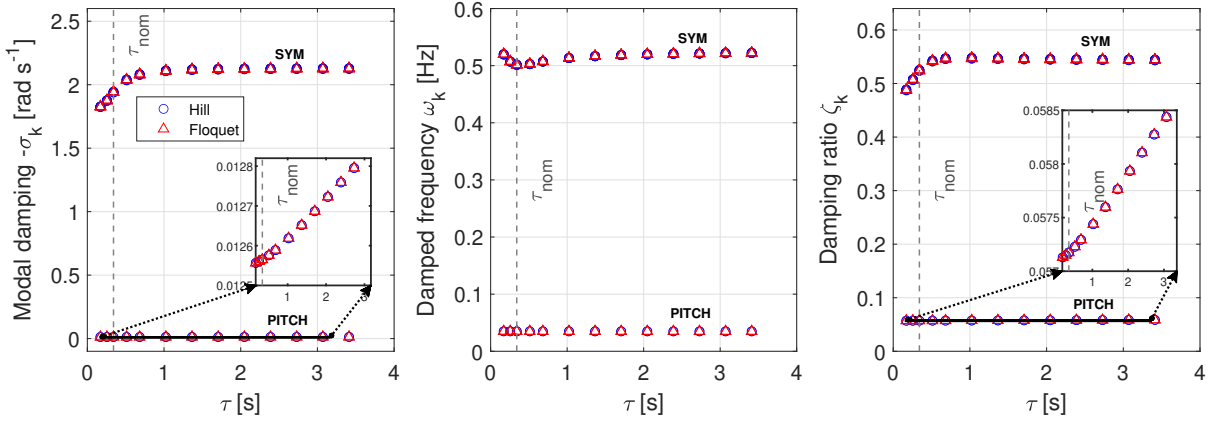

**Figure 9.** Modal damping, damped frequency and damping ratio for an eigenvalue analysis in the rotational frame with a time constant  $\tau$  variation.

For the most part, the blade symmetric mode is not that affected by a larger time constant at values above the nominal one. The time constant does however influence slightly the growth of the floater pitch mode's modal damping and damping ratio. The damping ratio  $\zeta_k$  is linked to the modal damping  $\sigma_k$  and to the principal damped frequency  $\omega_{p,k}$  as follows:

$$675 \quad \zeta_k = \frac{-\sigma_k}{|\omega_{p,k}| \sqrt{1 + \frac{\sigma_k^2}{\omega_{p,k}^2}}}. \quad (65)$$

When the modal damping  $\sigma_k$  is low in absolute value, evidently the damping ratio  $\zeta_k$  can be approximated simply as the ratio of  $\zeta_k \approx -\sigma_k/|\omega_k|$ . The floater pitch damping ratio increases marginally with  $\tau$  according to that approximation for  $\zeta_k$  since its modal damping is very small while its damped frequency remains constant.

680 There is a strong correlation between the time constant  $\tau$  and the dynamics of  $f_{s,l}$  (refer to Eq. (40)) which in turn influences the dynamic stall lift coefficient  $C_{L,l}$  according to Eq. (28). This clarifies why the time constant  $\tau$  has a noticeable effect on the blade modal damping whereas it barely impacts the platform pitch modal damping. It can also be observed that the eigenfrequencies for the blades DOFs  $a_l$  get slightly larger with the time constant  $\tau$  after the nominal value is surpassed. They increase so until reaching a plateau value where  $\tau$ 's growth affects minimally the damped frequency and modal damping, since large values of  $\tau$  leads to fixed values of  $f_s$ . Before the nominal  $\tau$  value is reached, there is an augmentation of the blade DOFs' 685 modal damping which leads to a reduction of the the damped frequency. Concerning the damping ratio, it follows the same trend as the modal damping for both the symmetric blade mode and the floater pitch mode.

### 7.1.2 Non-rotational frame

Figure 10 shows in the non-rotational (NR) frame the modal damping  $\sigma_k$ , damped frequencies  $\omega_k$  and damping ratio  $\zeta_k$  as a function of  $\tau$ . Results are reported for Hill's (marked  $\triangle$ ), Floquet's (marked  $\square$ ) and Coleman's (marked  $\diamond$ ) approach. In 690 the frequency plot, the blade lowest damped frequency belongs to the rotor first backward whirling (BW) mode, the middle

damped frequency belongs to the first symmetric flap mode (SYM), and the highest damped frequency belongs to the first forward whirling (FW) mode. The overall lowest damped frequency describes the floater pitch  $\xi_5$  mode and the lowest modal damping and damping ratio are also linked to that mode.

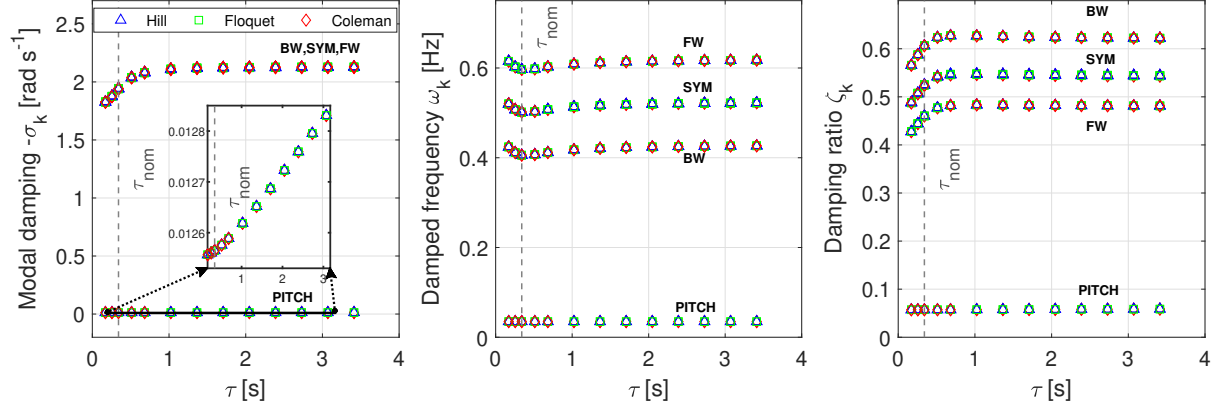

**Figure 10.** Modal damping, damped frequency and damping ratio for an eigenvalue analysis in the NR frame with a time constant  $\tau$  variation.

Results calculated via Hill's and Floquet's method are not originally found in the NR frame but they are reconstructed in that  
695 frame by applying the frequency shifts on the symmetric mode damped frequency to generate the rotor FW and BW whirling modes. The rotor FW mode's damped frequency is shifted away from the rotor SYM mode's damped frequency by a constant distance of  $+\Omega$ , and the rotor BW mode is shifted by  $-\Omega$  where  $\Omega = 5.73 \text{ RPM} = 0.0955 \text{ Hz}$  is the rotational speed of the operational point. That being said, the modal damping is the same in both frames, implying that  $\sigma_{k,NR} = \sigma_k$ , while the damped frequency in the rotational frame is expressed in the NR frame through the following shifts:

$$700 \quad \omega_{k,FW,NR} = \omega_{k,SYM} + \Omega, \quad \omega_{k,BW,NR} = \omega_{k,SYM} - \Omega, \quad (66)$$

given that  $\omega_{k,SYM,NR} = \omega_{k,SYM}$ . Afterwards, the damping ratio  $\zeta_k$  is found accordingly through Eq. (65) for all the blade modes,

$$\zeta_{k,FW,NR} = \frac{-\sigma_k}{|\omega_{k,FW,NR}| \sqrt{1 + \frac{\sigma_k^2}{\omega_{k,FW,NR}^2}}}, \quad \zeta_{k,BW,NR} = \frac{-\sigma_k}{|\omega_{k,BW,NR}| \sqrt{1 + \frac{\sigma_k^2}{\omega_{k,BW,NR}^2}}}, \quad (67)$$

and  $\zeta_{k,SYM,NR} = \zeta_{k,SYM}$  applies again for the SYM mode. Once the eigenvalues determined with Floquet and Hill's method  
705 are transformed in the NR frame, they do match perfectly with the ones calculated by directly solving the eigenvalue problem for the Coleman transformed system matrix  $\underline{\underline{A}}_{L,NR}$ . As for the difference in damping ratio between the FW, SYM and BW modes, it is due to the different damped frequencies for the three modes because the modal damping is identical and not influenced by the frame considered. According to Eq. (65), because the modal damping is the same for all three rotor modes, a BW mode experiences a higher modal damping above the symmetric mode, whereas a FW mode experiences instead a lower  
710 damping ratio.

Since the rotational speed  $\Omega$  is kept constant, the rotor BW, SYM, and FW modes' damped frequencies (distanced by  $1 \times \Omega$  from the SYM mode) and damping ratio values are equally spaced and they remain unaffected by the time constant  $\tau$  after the threshold of  $\tau = 1$  s has been exceeded.

## 7.2 Rotational speed $\Omega$ variation - Campbell diagram

715 To validate once more the correct implementation of Hill's and Floquet's method, an eigenvalue analysis for a varying rotational speed  $\Omega$  is performed. The modal damping  $\sigma_k$ , damped frequency  $\omega_k$  and damping ratio  $\zeta_k$  results are displayed on a Campbell diagram in the rotational and non-rotational frame. The operational point of  $V_0 = 8 \text{ m s}^{-1}$  and  $\Omega = 5.73 \text{ RPM}$  is yet again located in the usual region before stall where the flow is not exactly fully attached. For this operational point, we compute the steady state responses and the normal inflow velocity  $V_{\hat{n},l}$  which are kept constant for varying rotational speeds  $\Omega$ . However the  
720 rotational velocity is updated as  $V_{\hat{t},l} = -\Omega d$  and the aerodynamic parameters are calculated accordingly with a varying angle of attack  $\alpha$ . Using the eigenvalues calculated with Floquet's and Hill's method in the rotational frame, the rotor BW ( $-\Omega$ ) and FW ( $+\Omega$ ) modes are once again added on the damped frequency plot in the NR frame as offsets from the SYM blade mode. On the contrary, when solving the eigenvalues for the Coleman transformed system, these modes manifest themselves because they are rotor modes associated to a global fixed coordinate system rather than being blade specific.

### 725 7.2.1 Rotational frame

The purpose of this stability analysis is to demonstrate that the stability methods can determine the aerodynamic damping as a function of rotational speed. An augmentation of the rotational speed  $\Omega$  and of the tangential velocity component  $V_{\hat{t},l}$  amplifies the relative velocity  $V_{rel,l}$ , while simultaneously decreasing the angle of attack  $\alpha$ .

Results in Figure 11 show that with a greater rotational speed  $\Omega$ , the floater pitch motion's damped frequency does not rise  
730 significantly, but its modal damping increases slightly causing the damping ratio to be amplified considerably. It is also seen in Figure 11 that the damped frequency and modal damping predicted by Hill's (marked  $\circ$ ) and Floquet's (marked  $\triangle$ ) methods are well matched.



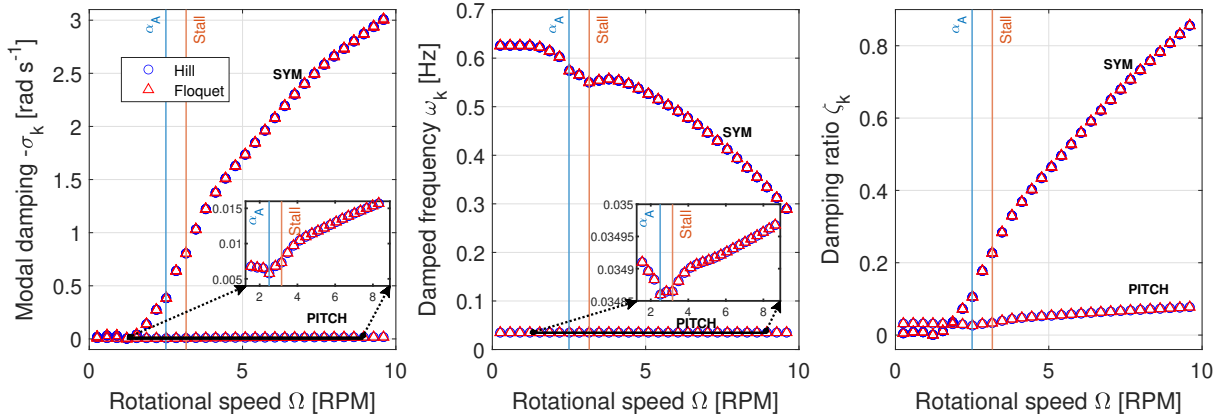

**Figure 11.** Modal damping, damped frequency and damping ratio for a Campbell diagram eigenvalue analysis in the rotational frame with a rotational speed variation. The operational point is of  $V_0 = 8 \text{ m s}^{-1}$ .

Further, the effect of increasing aerodynamic damping is observable notably in terms of a decreased blades DOFs  $a_l$  damped frequency. The amplification of the relative velocity  $V_{rel,l}$  increases the aerodynamic damping through the lift loads and leads to a higher blade modal damping. Thus, at lower rotational speeds the symmetric blade mode has a very small modal damping and a low damping ratio too, which also applies to the floater pitch mode. At very low rotational speeds, the blades damping ratio is even smaller than the floater pitch one, but it grows drastically with rotational speed and overpasses it soon after. In view of this, with a higher aerodynamic damping at higher rotational speeds  $\Omega$ , the natural frequencies for the pitch DOF  $\xi_5$  barely increases and remains almost unchanged in comparison to the apparent reduction of the blade natural frequencies. Nevertheless, the damping ratio also increases for the floater pitch mode in a linear way according to the approximation  $\zeta_k \approx -\sigma_k/|\omega_k|$  that holds since its modal damping is very low, and the damped frequency remains almost unaffected. It ensues that the aerodynamic damping is influencing more the eigenvalues of the blades DOFs than the floater pitch eigenvalue.

The change in damped frequency at 3.16 RPM is due to the occurrence of stall at that rotational speed with a corresponding angle of attack as can be seen in Figure 4. At the stall angle, the gradient  $\partial f_{static,l}/\partial \alpha_l$  starts increasing locally. The resulting change in damped frequency at the stall RPM is caused by a high fluctuation of aerodynamic parameters and it demonstrates that the stability analysis methods can detect the effect of stall. Fluctuations at other rotational speeds are caused by gradual numerical changes too in the gradient  $\partial f_{static,l}/\partial \alpha_l$  for corresponding angles of attacks as detailed in Figure 4. The angle of attack noted  $\alpha_A$  in Figure 4 represents a sudden rise in the value of  $\partial f_{static}/\partial \alpha$  which disturbs mainly the floater pitch motion damping trend. That sudden change in  $\partial f_{static,l}/\partial \alpha_l$  is connected to the stall region in Figure 3 where the static lift coefficient  $C_{L,static}$  starts decreasing with the angle of attack while the full stall coefficient  $C_{L,stall}$  slope stops increasing. In short the angle of attack region between the onset of stall and  $\alpha_A$  is a region which impacts both the damping and damped frequency for the floater pitch motion, and only the damped frequency for the blades.

## 7.2.2 Non-rotational frame

Comparing eigenvalues on a Campbell diagram with both Hill's (marked  $\triangle$ ) and Floquet's (marked  $\square$ ) method, as well as with the Coleman approach (marked  $\diamond$ ) allows to cross-validate them at last in the NR frame. Just like in Figure 10 for the time constant  $\tau$  variation eigenvalue analysis expressed in the NR frame, the rotor FW and BW modes are reconstructed as before from the SYM mode when using Hill's and Floquet's method to compare with the Coleman-based results. The Campbell diagram in Figure 12 proves that the eigenvalues found with either procedure are equal.

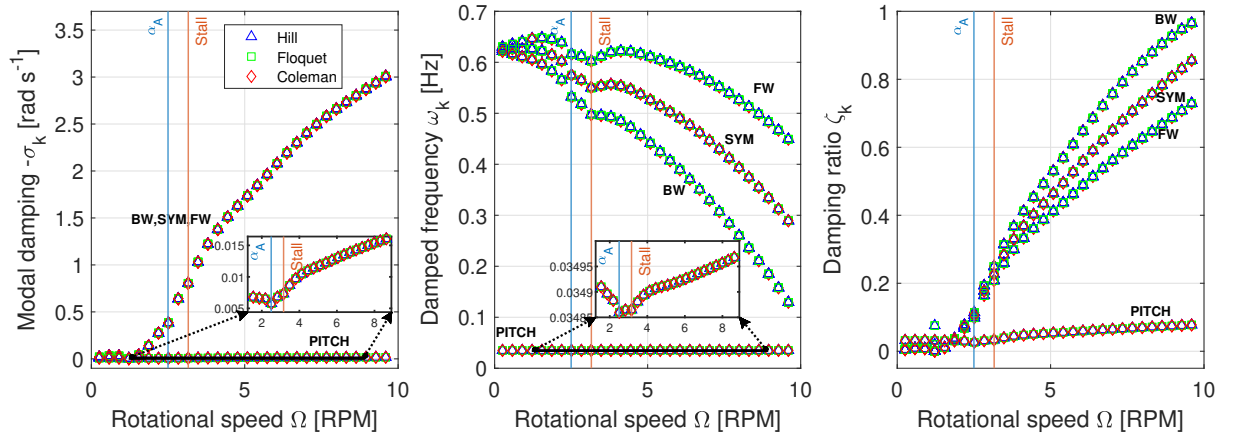

**Figure 12.** Modal damping, damped frequency and damping ratio for a Campbell diagram eigenvalue analysis in the NR frame with a rotational speed variation. The operational point is of  $V_0 = 8 \text{ m s}^{-1}$ .

The three blades modes all have a modal damping that increases with rotational speed, while their natural frequencies decrease. To summarize, a growth of modal damping and a drop of damped frequency cause simultaneously the damping ratio to rise with rotational speed. Moreover, for the NR frame, the blades DOFs rotor FW mode is associated to a lower damping ratio curve, while the rotor BW mode is linked instead to a higher damping ratio curve. This occurs because all three blade modes curves are associated to the same modal damping, refer to the damping ratio expression in Eq. (65). The rotor's SYM mode's curve is the middle one in both the damped frequency and damping ratio plots. The BW, SYM and FW natural frequencies and damping ratio curves become more distinguishable from each other at higher rotational speeds due to the application of the  $\pm\Omega$  frequency offset.

## 8 Two-bladed floating wind turbine model

The main motivation for developing the two-bladed floating wind turbine model is to test under different design circumstances and operational conditions the applicability of our developed Coleman free aero-elastic stability methods, namely Hill's and Floquet's method. As a reminder, using only the Coleman transform for a two-bladed rotor would not result in making the system to be LTI which is another reason to rely on those methods in the first place. The Coleman transform for a two-bladed

rotor does not use the azimuthal periodicity in its definition but rather its eigenmodes. For a two-bladed rotor, if one were to apply the Coleman transform, the periodicity of the system matrix could be eliminated through the use of a supplementary method such as Floquet's or Hill's method.

775 The two-bladed wind turbine model is obtained firstly by having a blade chord length  $c$  increased by a factor  $3/2$  compared to the three-bladed model (Kim et al., 2015). This chord length extension is applied for all airfoils across the whole blade length span. It accounts for the reduction of the number of blades so that the same lift, thrust and torque would be generated by both wind turbines models. This blade design change affects equally so the airfoil section of interest at  $r = d$ . The two-bladed model EOMs differ from the three-bladed case due to the system matrices size reduction through an elimination of matrices  
780 rows and columns that pertain to the third blade components. In light of this, the structural DOFs vector for the two-bladed wind turbine is  $\underline{x}_{3 \times 1} = [\xi_5, a_1, a_2]^T$  in the EOM from Eq. (26). Subsequently, the state vector within the state-space ODE from Eq. (36) is  $\underline{q} = [\underline{x}_{3 \times 1}^T, \dot{\underline{x}}_{3 \times 1}^T, f_{s,1}, f_{s,2}]^T$  and is of dimension  $N_s = 8$ . The system matrices are thus fundamentally the same except for the scaling of the chord length, and the matrices size reduction. The azimuthal angular  $\Psi_l$  position of the two blades is also changed as prescribed by Eq. (1) with  $N_b = 2$  and all system equations are modified accordingly.

## 785 8.1 Decay test

To verify that the two-bladed wind turbine linearized model has been rightfully built, decay tests simulations are performed. Like for the three-bladed rotor case, results are presented in the time domain as variations from the steady states. The simulations time span is relatively short because there is a focus to analyze the time responses of signals pertaining to the DOFs  $a_l$  and  $f_{s,l}$  until they reach their steady state. The simulation conditions that are considered are the same as for the three-bladed  
790 decay test in Figure 5, meaning that an operational point of  $V_0 = 8 \text{ m s}^{-1}$  and  $\Omega = 0.6 \text{ rad s}^{-1}$  is applied. The resulting steady state angle of attack and lift coefficient is still positioned in the same region before stall where the flow is not fully attached. Once more, the structural DOFs initial conditions for the simulation are the negative value of the steady state values with corresponding dynamic stall  $f_{s,l}$  variables initial conditions, meaning that  $\xi_5(t = 0) = -0.02 \text{ rad}$ ,  $a_l(t = 0) = -10.54 \text{ m}$ , and that  $f_{s,l}(t = 0) = -0.73$ .

795 Figure 13 presents the decay responses for the linear model (LM) and time domain model (TDM). We observe a slight difference in time series for the blades deflection amplitude  $a_l$  signals and for the dynamic stall variable  $f_{s,l}$  before reaching the steady state of the operational point. That difference in responses between the time domain and linear model originates from the initial conditions being considerably far away from the operational point's steady state. Nevertheless, it is clear that the linearized model generates consistent time responses compared to the time domain model.

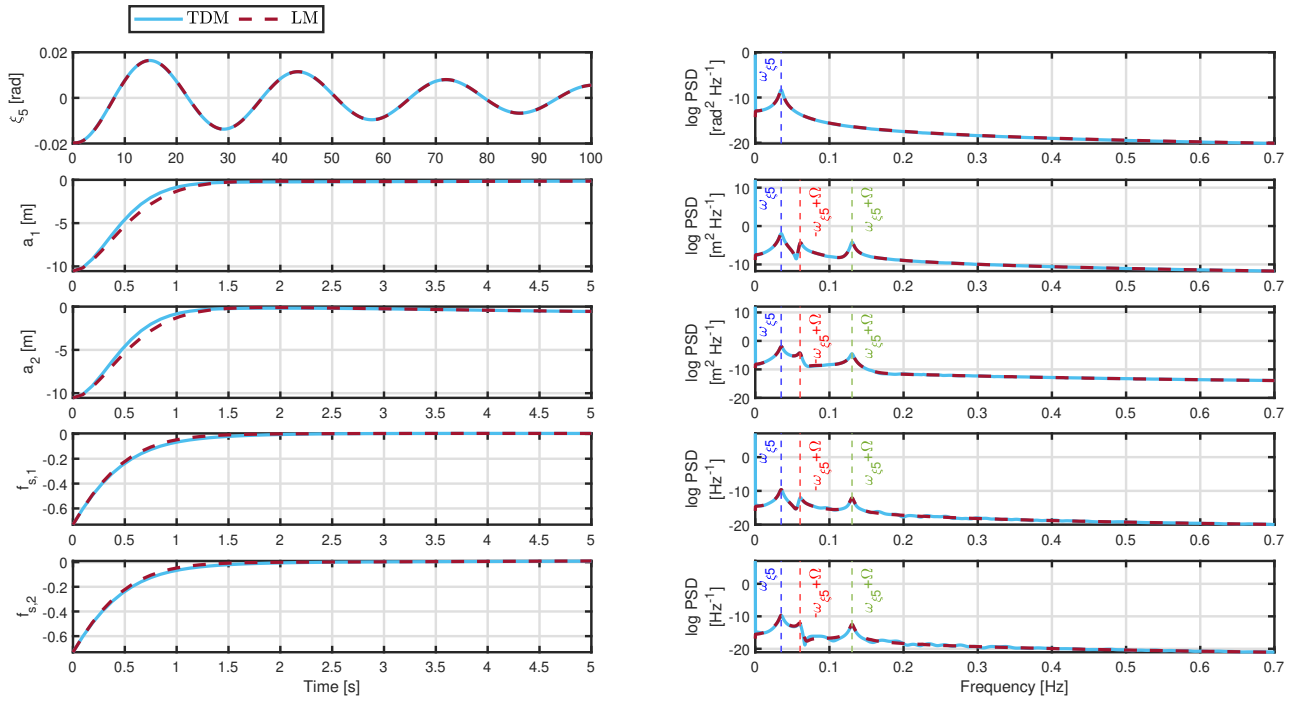

**Figure 13.** Decay test for the operational point of  $V_0 = 8 \text{ m s}^{-1}$ ,  $\Omega = 0.6 \text{ rad s}^{-1}$  and  $\tau = 0.512 \text{ s}$  for the two-bladed wind turbine, where time domain model (TDM) and linear model (LM) results are compared.

800 As anticipated, the time domain responses are converging fast towards the steady states also for the two-bladed model. Just like for the three-bladed wind turbine results from Figure 5, the PSDs plots do not capture the blades DOFs  $a_l$  natural frequency,  $\omega_{1f} = 0.6255 \text{ Hz}$ , because the aerodynamic damping effect prevents it. However, the natural frequency of the floater pitch motion,  $\omega_{\xi_5}$ , is clearly observable as a peak value in the  $\xi_5$  signal, and other natural frequencies of the system are not observable in this signal due to its own natural frequency dominant effect. Similarly to results for a three-bladed rotor in Figure  
805 5, the other signals for the  $a_l$  and  $f_{s,l}$  DOFs show peaks also at the frequencies of  $-\omega_{\xi_5} + \Omega$  and  $\omega_{\xi_5} + \Omega$  which are caused by the system's periodicity.

## 8.2 Eigenvalue analysis

For the eigenvalue analysis of the two-bladed wind turbine, the applicability of Floquet's and Hill's method remains to be demonstrated by executing the same studies as previously done for the three-bladed rotor. It is also relevant to analyze the  
810 distinctions in the eigenvalues trends between those computed for the two- and three-bladed rotor. This is relevant in particular for the Campbell diagram study.

The eigenvalues are originally computed in the rotational frame because the Coleman transform is not applicable for the two-bladed rotor. Despite that, they are expressed in the NR frame through a reconstruction of the rotor BW and FW modes.

### 8.2.1 Time constant $\tau$ variation eigenvalue analysis

815 In regard to the eigenvalue analysis for a varying time constant  $\tau$ , results for the two-bladed wind turbine in Figure 14 are similar to the three-bladed case in terms of tendency to reach plateau values with an increasing  $\tau$ . The current eigenvalue results consider the same simulations conditions as for the three-bladed rotor simulations in the same region, meaning that the operational point still has an inflow velocity of  $V_0 = 8 \text{ ms}^{-1}$ , and a rotational speed of  $\Omega = 5.73 \text{ RPM}$ , but a nominal time constant of  $\tau_{nom} = 0.512 \text{ s}$  instead. Similarly to previous results in Figure 9 for the three-bladed rotor, the blades damped

820 frequency are smallest at the nominal  $\tau$  value for the current operational point. Furthermore, for the rotor BW and FW modes, the blades natural frequencies are shifted again by a constant rotational speed  $\Omega = 5.73 \text{ RPM}$  away from the SYM blade mode's damped frequency. In accordance with previous results, the floater pitch damped frequency remains almost constant whereas its modal damping  $\sigma$  increases proportionally to  $\tau$  and so does consequently its damping ratio  $\zeta$ . The only distinction between the two- and three-bladed rotor results in Figure 14 and 10, are the damping and natural frequencies values magnitude

825 for the blades DOFs. For the two-bladed rotor, the blades natural frequencies are lower, while the modal damping and damping ratio are considerably higher. Due to its increased chord length, the two-bladed rotor experiences higher aerodynamic loads on each blade and for that reason a higher aerodynamic damping.

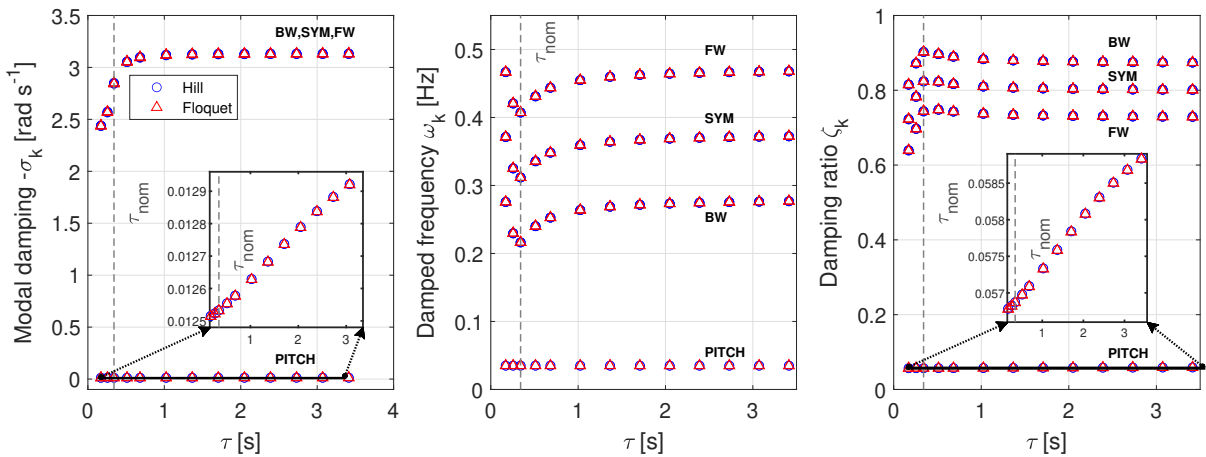

**Figure 14.** Modal damping, damped frequency and damping ratio for an eigenvalue analysis in the NR frame with a time constant  $\tau$  variation.

### 8.2.2 Rotational speed $\Omega$ variation - Campbell diagram

On the subject of eigenvalue results for the Campbell diagram study, the two-bladed rotor's BW and FW modes can only be

830 obtained through the frequency shift away from the blade symmetric mode since the Coleman transform is not applicable in this context. Figures 15 and 16 report the Campbell diagrams for two operational points with the same rotational speed of  $\Omega = 5.73 \text{ RPM}$  that are located in the region before stall for a flow not fully attached. Their inflow velocities are respectively  $V_0 = 8 \text{ ms}^{-1}$  and  $10 \text{ ms}^{-1}$ , and their corresponding nominal time constants are  $\tau_{nom} = 0.512 \text{ s}$  and  $\tau_{nom} = 0.508 \text{ s}$ . The

operational point is used to get the steady states and the normal inflow velocity  $V_{n,l}$ , but not the rotational velocity which is updated  $V_{\dot{i},l}$  with  $-\Omega d$  and so is the time constant  $\tau$  accordingly. We consider here these two different inflow velocities when investigating the eigenvalues trends to support our conclusions on the matter for the three- and two-bladed rotor design.

First of all, in Figures 15 and 16, the occurrence of stall around 3.00 RPM for an inflow velocity of  $V_0 = 8 \text{ ms}^{-1}$  and 4.1216 RPM for  $V_0 = 10 \text{ ms}^{-1}$  has a noticeable influence on the blades natural frequencies, which is similar to what was detected in Figure 11 for the three-bladed rotor. As noticed earlier for the three-bladed rotor, according to the variation of  $\partial f_{s,static}/\partial\alpha$  in Figure 4 with respect to the angle of attack, there is a high impact on the eigenvalue analysis in the stall proximity region, between the stall angle of attack and the angle of attack  $\alpha_A$ . Likewise, it can be observed in Figures 15 and 16, that the two-bladed rotor's floater pitch motion's damped frequency, and especially its damping, are highly fluctuating in that angle of attack region. The blades damped frequencies are also highly impacted by the local variation of aerodynamic parameters in that region.

For the results with an inflow velocity of  $V_0 = 8 \text{ ms}^{-1}$  compared to  $V_0 = 10 \text{ ms}^{-1}$ , an overall higher blade modal damping is observed because the angles of attack are lower for the same rotational speeds in the angle of attack region after stall occurs, meaning above 15 deg. According to the airfoil data in Figure 3, in that region, lower angles of attack are associated to a greater  $f_s$  value and to a lower  $C_{L,inv}$ , but the  $C_{L,stall}$  value can vary. Thus, the overall value of the dynamic lift coefficient  $C_L$  can increase due to the impact of the dynamic stall variable  $f_s$ , refer to Eq. 28. A higher lift coefficient  $C_L$  would increase the lift force and ultimately generate a higher blade modal damping. Conversely, in the region where the flow is not attached and before stall occurs, a higher angle of attack value generates a greater  $C_{L,inv}$  and  $C_{L,stall}$ . This comes along with a lower  $f_s$  which can also increase the overall value of the dynamic lift coefficient  $C_L$  depending on the impact of the dynamic stall variable  $f_s$ .

As a marked difference from the three-bladed rotor, a pronounced maximum in the blade modal damping is reached for a rotational speed of 6.054 RPM for  $V_0 = 8 \text{ ms}^{-1}$  and 5.57 RPM for  $V_0 = 10 \text{ ms}^{-1}$ . The higher modal damping occurs for the lower inflow velocity of  $V_0 = 8 \text{ ms}^{-1}$  where the modal damping increases with rotational speed until reaching a maximal value at a lower angle of attack around  $\alpha = 7.78 \text{ deg}$  compared to  $\alpha = 11.52 \text{ deg}$  for the higher inflow velocity of  $V_0 = 10 \text{ ms}^{-1}$ . At that particular rotational speed, the angle of attack is positioned between the inviscid fully attached flow region and the stall region just like the operational point. The blades modal damping and damped frequency curves for  $V_0 = 10 \text{ ms}^{-1}$  fluctuate more because of a higher lift load variation with a greater inflow velocity. In this context the two-bladed rotor experiences higher aerodynamic loads through higher lift loads because of the chord length being increased. Therefore, a small variation of the angle of attack, particularly at higher inflow velocities  $V_0$  with greater lift variations, can cause such fluctuations in the eigenvalues. This difference in modal behavior on a Campbell diagram is a characteristic for the two-bladed floating wind turbine that is accentuated compared to the three-bladed rotor.

Moreover, the attained maxima of blade modal damping is different compared to the three-bladed case. For example, as mentioned previously, at  $V_0 = 8 \text{ ms}^{-1}$  the blade modal damping maxima occurs at  $\Omega = 6.054 \text{ RPM}$ . We investigate this further in Figure 17 when a change in trend with rotational speed  $\Omega$  occurs for the gradient  $\partial \dot{f}_{s,i}/\partial \dot{x}_j$ , which is the partial derivative of the dynamic stall variable  $f_s$  with respect to the structural DOFs time derived vector  $\dot{x}$ . The overall variation

of the gradient  $\partial \underline{f}_{s,i} / \partial \underline{\dot{x}}_j$  components in the LTI system matrix is evaluated as a 1-norm ( $\|\cdot\|_1$ ) which is a sum of matrix components in absolute value. Results for  $\partial \underline{f}_{s,i} / \partial \underline{\dot{x}}_j$  are investigated using Hill's matrix  $\underline{A}_0$ , i.e.  $\|\Sigma \underline{f}_{s,i} / \partial \underline{\dot{x}}_j\|_{\underline{A}_0}^1$ , and using Floquet's diagonalized matrix with updated eigenvalues and corresponding eigenfrequencies shifts  $\underline{R}$ , i.e.  $\|\Sigma \underline{f}_{s,i} / \partial \underline{\dot{x}}_j\|_{\underline{R}}^1$ . We also investigate eigenvectors changes with rotational speed  $\Omega$  to understand furthermore the causes for the variation of blade modal damping. Upon inspection of the structural modes eigenvectors  $\underline{v} = [v_1, \dots, v_8]^T$ , we identify the symmetric blade mode eigenvector  $\underline{v}_{SYM}$  as having only blade amplitude components  $a_l$  for the displacement ( $v_{SYM,2}$  and  $v_{SYM,3}$ ) and acceleration ( $v_{SYM,5}$  and  $v_{SYM,6}$ ) DOFs, as well as dynamic stall values for the  $f_{s,l}$  DOFs ( $v_{SYM,7}$  and  $v_{SYM,8}$ ). When considering the absolute value of eigenvectors,  $|\underline{v}|$ , with respect to their real and imaginary parts, we notice for the symmetric blade mode that only the  $f_{s,l}$  components, which are equal ( $|v_{SYM,7}| = |v_{SYM,8}|$ ), vary with rotational speed  $\Omega$ . For instance, the same trend as for the gradient  $\partial \underline{f}_{s,i} / \partial \underline{\dot{x}}_j$  is observed at the rotational speed of maximal blade modal damping for the SYM blade mode's eigenvector dynamic stall components evaluated as absolute values,  $|v_{SYM,7}| = |v_{SYM,8}| = |v_{SYM,f_{s,l}}|$ . This points out the high correlation in this case between the gradient  $\partial \underline{f}_{s,i} / \partial \underline{\dot{x}}_j$  and the SYM blade mode. Onward from the rotational speed of maximal blade modal damping, there is a visible change in shape for the results curves. For  $V_0 = 10 \text{ ms}^{-1}$  these changes occur at  $\Omega = 5.57 \text{ RPM}$  according to Figure 18. We also observe in Figures 17 and 18 that the curves for the gradient  $\partial \underline{f}_{s,i} / \partial \underline{\dot{x}}_j$  and for the symmetric mode's eigenvector dynamic stall variable reach a maximal value at a rotational speed associated to the angle of attack in the region where dynamic stall starts to occur. All these observations indicate that for varying rotational speeds, the dynamic stall gradient  $\partial \underline{f}_{s,i} / \partial \underline{\dot{x}}_j$  impacts greatly the SYM blade mode and consequently also the blade modal damping.

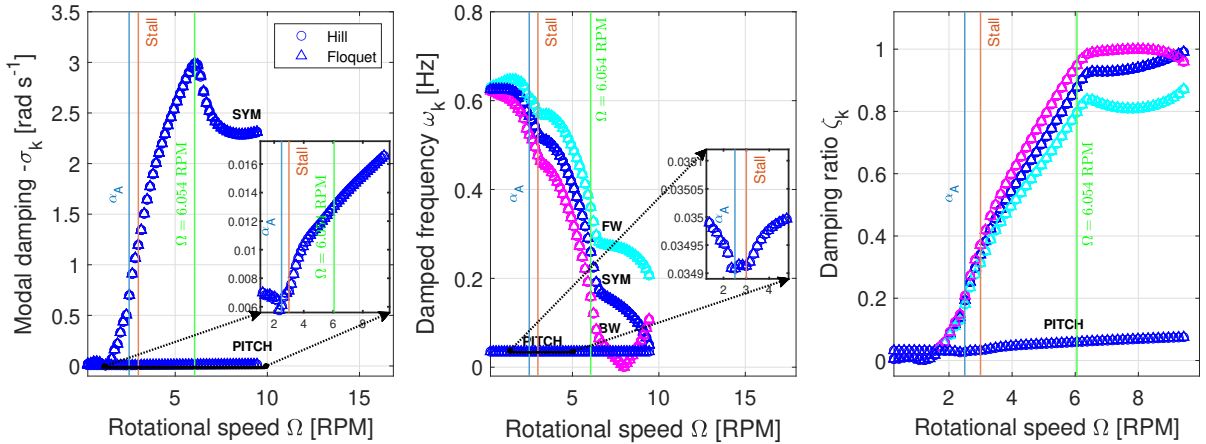

**Figure 15.** Modal damping, damped frequency and damping ratio for a Campbell diagram eigenvalue analysis in the NR frame with a rotational speed variation. The operational point is of  $V_0 = 8 \text{ ms}^{-1}$ .

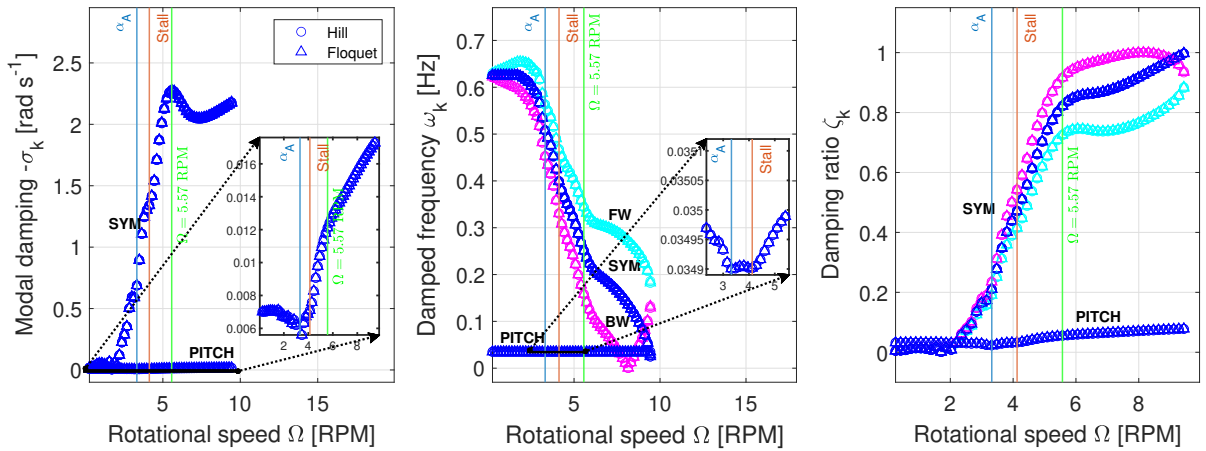

**Figure 16.** Modal damping, damped frequency and damping ratio for a Campbell diagram eigenvalue analysis in the NR frame with a rotational speed variation. The operational point is of  $V_0 = 10 \text{ ms}^{-1}$ .

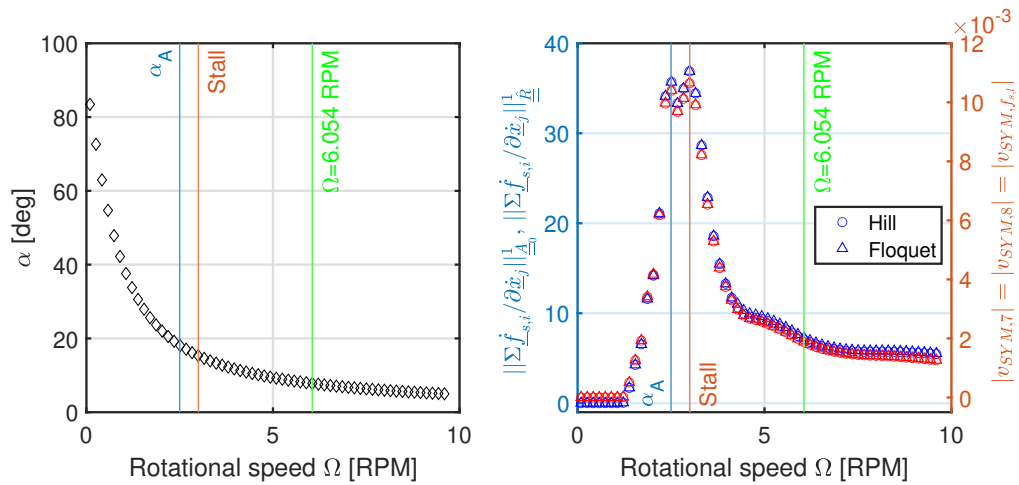

**Figure 17.** Angle of attack  $\alpha$ , 1-norm of the gradient  $\partial \underline{f}_{-s,i} / \partial \underline{\dot{x}}_j$  components, and dynamic stall component of the symmetric blade mode ( $|v_{SYM,7}|$ ) for the LTI system matrix using Hill's and Floquet's method. The rotational speed  $\Omega$  is varied for the operational point of  $V_0 = 8 \text{ ms}^{-1}$ .



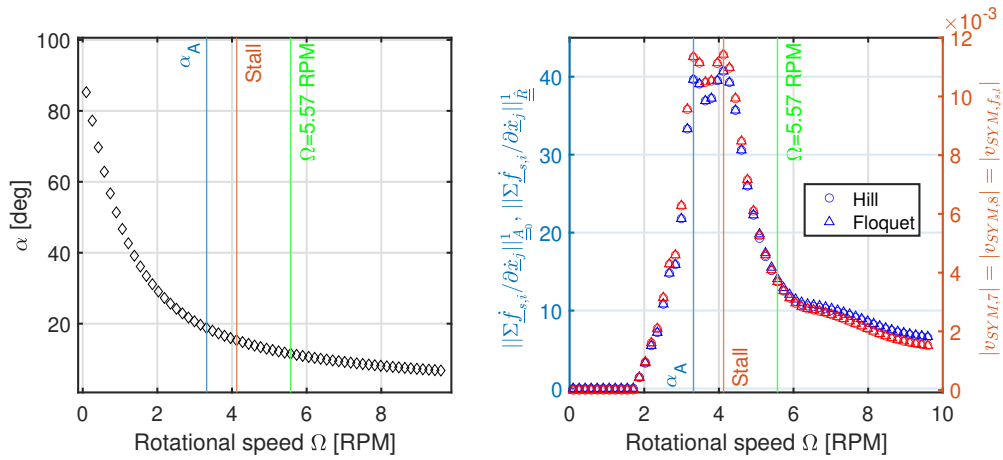

**Figure 18.** Angle of attack  $\alpha$ , 1-norm of the gradient  $\partial \dot{f}_{-s,i} / \partial \dot{x}_j$  components, and dynamic stall component of the symmetric blade mode ( $|v_{SYM, f_s, l}|$ ) for the LTI system matrix using Hill's and Floquet's method. The rotational speed  $\Omega$  is varied for the operational point of  $V_0 = 10 \text{ m s}^{-1}$ .

Finally, for the two-bladed rotor, an increased chord length gives overall a larger lift and a larger blade modal damping. At large RPMs, the blade damping is so strong ( $\zeta \approx 1$ ) that the damped frequency tends to zero. In consequence, it can be seen for both test cases in Figures 15 and 16 that the rotor backward whirling mode reaches a critical damping state when the damping ratio is  $\zeta = 1$ . The rotor backward whirling mode also experiences a reflection of its damped frequency once reaching a null value because a negative frequency is not physically plausible.

## 9 Conclusions

A three-bladed floating wind turbine time domain model and a linear model were established to devise Coleman free methods for aero-elastic stability analysis. It was demonstrated how the presence of gravity leads to additional terms in the stiffness matrix that couples the blade deflection and floater pitch, thus introducing a dependency to the floater equilibrium tilt angle for the stability analysis. This tilt dependency on the structural dynamics disappeared when gravity was excluded. The aerodynamic states were included in the model through the dynamic stall variable  $f_s$  with its respective ODE, then the time domain model was linearized with the inclusion of the aerodynamic damping contribution. The time domain and linear model enabled to do a first dynamic stall analysis by varying the floater pitch excitation intensity for different operational points where stall occurs, which verified the match between the two models. Another time domain hysteresis analysis was conducted with the time constant  $\tau$  being fixed at different intensity levels while operating in the region before stall with a non attached flow. Those analyses verified that both the time domain and linear model were consistent, and that they represented the wished physical behaviour of the floating wind turbine.

Afterwards, the three-bladed linear model was rendered time independant through the use of Hill's and Floquet's method. Once the linear model was made time invariant, all stability analyses proved that the impact of aerodynamic states is observable

905 both in terms of modal damping and damped frequency. For the sake of completeness and understanding of Hill's and Floquet's methods, the eigenvalues results were cross-validated with each other for multiple stability studies. The first eigenvalue analysis was carried out for a varying time constant  $\tau$  and it demonstrated that both methods produced matching results that included the damping influence of the aerodynamic states. The next eigenvalue analysis was accomplished on a Campbell diagram where the rotational speed was varied. Results showed again a perfect agreement between the eigenvalues provided by both  
 910 methods. Following those eigenvalue studies, a modification of the frame, from a rotating frame to a fixed non-rotating one, was applied to the system through the Coleman transform. The evolution of eigenvalues with respect to the variation of  $\tau$  and rotational speed  $\Omega$  was examined in the new frame too. These results were compared to previous ones expressed in the rotating frame, and they were identical irrespective of the method applied, Floquet's or Hill's. This comparison illustrated that having stability analyses executed for a Coleman free system provides the same eigenvalues for the blades symmetric mode as with  
 915 the Coleman transformed system. Using Hill's and Floquet's eigenvalues computed in the rotational frame, it was proven that it is possible to reconstruct the rotor forward and backward whirling modes' eigenvalues of the model so that they are identical to those obtained directly with the Coleman transformed system matrix.

Finally, a two-bladed rotor model was implemented for the main objective of investigating the change of eigenvalues in a Campbell diagram compared to results for the three-bladed rotor model. Two different inflow velocity cases were tested. The  
 920 same methods of Hill's and Floquet's were applied for the two-bladed stability studies and both of them produced matching results again. Both methods were utilized for the two-bladed rotor too to reconstruct the rotor forward and backward whirling modes with the frequency shift of  $\pm\Omega$  away from the symmetric blade mode. Results have shed a light on the major differences that can be present for the two-bladed wind turbine stability analysis. Just like for the three-bladed rotor, the region where stall occurs had a noticeable impact on the two-bladed rotor's eigenvalues. The blade modal damping had a distinct peak at the  
 925 rotational speed of  $\Omega = 6.054$  RPM for an inflow velocity of  $V_0 = 8 \text{ m s}^{-1}$ , whereas the peak was located at  $\Omega = 5.57$  RPM for an inflow velocity of  $V_0 = 10 \text{ m s}^{-1}$ . This observation was investigated further through inspection of the dynamic stall gradient of  $\partial \dot{f}_{-s,i} / \partial \dot{x}_j$  with respect to the structural DOFs velocity vector  $\dot{x}$ . The 1-norm value of the gradient  $\partial \dot{f}_{-s,i} / \partial \dot{x}_j$  components (summed absolute values) was considered for the LTI system matrix with Hill's (matrix  $\underline{\underline{A}}_0$ ) and Floquet's method (updated diagonalization matrix  $\underline{\underline{R}}$ ). It was observed that the maximum blade modal damping was seen to coincide with a change of  
 930 curve trend for the stall gradient as well as for the symmetric blade mode's dynamic stall DOF  $f_s$ . For varying rotational speeds  $\Omega$  (and angles of attack  $\alpha$ ), the change caused by the gradient  $\partial \dot{f}_{-s,i} / \partial \dot{x}_j$  in the system matrix generated a fluctuation with the same trend observed in the symmetric blade mode's eigenvector dynamic stall variable  $f_s$  value.

In line with previous studies, special attention was needed for the selection of the principal eigenfrequencies when applying both Hill's and Floquet's methods. When using Hill's method, the principal eigenfrequencies selection was facilitated because  
 935 the harmonic matrix  $\underline{\underline{A}}_{L,j=0}$  from the Fourier expansion of  $\underline{\underline{A}}_L(t)$  had components that were overall higher in value than for higher harmonics matrices  $\underline{\underline{A}}_{L,j \neq 0}$ . One could select the principal eigenfrequencies as being closest to the ones associated to  $\underline{\underline{A}}_{L,j=0}$ . As for Floquet's method, it was unable to calculate more than the principal damped frequency per system state, meaning that it could not consider the system's full periodicity unlike Hill's method. The other drawback of Floquet's method was that it was computationally demanding in time duration compared to Hill's method. Essentially, it was a numerically less

940 efficient method on account of the need to compute the transition state or monodromy matrix by carrying out as many decay  
simulations of a period duration as there are states. However, for situations where the system matrix is not available or for the  
analysis of experimentally acquired time series, Floquet's method would be a better alternative compared to Hill. In that case,  
the monodromy matrix could be extracted directly from responses after a period without further need for simulation. Although  
Hill's method relied on a bigger expanded state-space matrix to solve the eigenvalue problem, it was still computationally less  
945 costly than Floquet's method in our context. In spite of that, we found that both methods are reliable and accurate to provide  
consistent and identical eigenvalue results.

Future work will focus on relying on Hill's method for fast response calculations by using improved approaches compared  
to our previous methodology (Pamfil et al., 2024).

*Code and data availability.* The MATLAB code used for simulations and the numerical data are provided upon request to the main author.

950 *Author contributions.* BP wrote most of the paper and developed entirely the numerical setup for simulations. HB and TK also contributed  
to the writing process, and provided valuable revisions that guided BP in editing the paper.

*Competing interests.* The authors declare that they do not have any competing interests or a conflict of interests.

## References

- Bak, C., Zahle, F., Bitsche, R., Kim, T., Yde, A., Henriksen, L. C., Natarajan, A., and Hansen, M.: Description of the DTU 10 MW reference  
955 wind turbine, DTU Wind Energy Report-I-0092, 5, 2013.
- Bauchau, O. and Nikishkov, Y.: An Implicit Floquet Analysis for Rotorcraft Stability Evaluation, Journal of The American Helicopter Society  
- J AMER HELICOPTER SOC, 46, <https://doi.org/10.4050/JAHS.46.200>, 2001.
- Bir, G.: Multi-Blade Coordinate Transformation and its Application to Wind Turbine Analysis, <https://doi.org/10.2514/6.2008-1300>, 2008.
- Borg, M., Pegalajar-Jurado, A., Stiesdal, H., Madsen, F., Nielsen, T., Mikkelsen, R., Mirzaei, M., Lomholt, A., and Bredmose, H.:  
960 Dynamic response analysis of the TetraSpar floater in waves: Experiment and numerical reproduction, Marine Structures, 94,  
<https://doi.org/10.1016/j.marstruc.2023.103546>, 2024.
- Bortolotti, P., Chetan, M., Branlard, E., Jonkman, J., Platt, A., Slaughter, D., and Rinker, J.: Wind Turbine Aeroelastic Stability in OpenFAST,  
Journal of Physics: Conference Series, 2767, 022 018, <https://doi.org/10.1088/1742-6596/2767/2/022018>, 2024.
- Bottasso, C. and Cacciola, S.: Model-independent periodic stability analysis of wind turbines, Wind Energy, 18, 865–887,  
965 <https://doi.org/https://doi.org/10.1002/we.1735>, 2015.
- Christensen, R. H. and Santos, I. F.: Modal Controllability and Observability of Bladed Disks and their Dependency on the Angular Velocity,  
Journal of Vibration and Control, 11, 801–828, 2005.
- Coleman, R., Feingold, A., and for Aeronautics, U. S. N. A. C.: Theory of Self-excited Mechanical Oscillations of Helicopter Rotors with  
Hinged Blades, NACA R-1351, National Advisory Committee for Aeronautics, <https://books.google.dk/books?id=59nAmQEACAAJ>,  
970 1957.
- CORROSION: ICCP for floating devices, <https://www.corrosion.nl/iccp-floating/>, 2023.
- Filsoof, O. T., Hansen, M. H., Yde, A., Bøttcher, P., and Zhang, X.: A novel methodology for analyzing modal dynamics of multi-rotor wind  
turbines, Journal of Sound and Vibration, 493, 115 810, <https://doi.org/https://doi.org/10.1016/j.jsv.2020.115810>, 2021.
- Floquet, G.: Sur les équations différentielles linéaires à coefficients périodiques, Annales scientifiques de l'École Normale Supérieure, 2e  
975 série, 12, 47–88, <https://doi.org/10.24033/asens.220>, 1883.
- Frulla, G.: Rigid rotor dynamic stability using Floquet theory, European Journal of Mechanics - A/Solids, 19, 139–150,  
[https://doi.org/https://doi.org/10.1016/S0997-7538\(00\)00151-0](https://doi.org/https://doi.org/10.1016/S0997-7538(00)00151-0), 2000.
- Genta, G.: Whirling of unsymmetrical rotors: A finite element approach based on complex co-ordinates, Journal of Sound and Vibration,  
124, 27–53, [https://doi.org/https://doi.org/10.1016/S0022-460X\(88\)81404-4](https://doi.org/https://doi.org/10.1016/S0022-460X(88)81404-4), 1988.
- 980 Hansen, M.: Aerodynamics of wind turbines, Earthscan, 3 edn., ISBN 9781138775077, 2015.
- Hansen, M., Gaunaa, M., and Aagaard Madsen, H.: A Beddoes-Leishman type dynamic stall model in state-space and indicial formulations,  
no. 1354(EN) in Denmark. Forskningscenter Risoe. Risoe-R, ISBN 87-550-3090-4, 2004a.
- Hansen, M., Gaunaa, M., and Aagaard Madsen, H.: A Beddoes-Leishman type dynamic stall model in state-space and indicial formulations,  
no. 1354(EN) in Denmark. Forskningscenter Risoe. Risoe-R, ISBN 87-550-3090-4, 2004b.
- 985 Hansen, M. H.: Aeroelastic stability analysis of wind turbines using an eigenvalue approach, Wind Energy, 7, 133–143,  
<https://doi.org/https://doi.org/10.1002/we.116>, 2004.
- Hansen, M. H.: Modal dynamics of structures with bladed isotropic rotors and its complexity for two-bladed rotors, Wind Energy Science,  
1, 271–296, <https://doi.org/10.5194/wes-1-271-2016>, 2016.

- Hill, G. W.: On the part of the motion of the lunar perigee which is a function of the mean motions of the sun and moon, *Acta Mathematica*, 36, 1871–2509, <https://doi.org/https://doi.org/10.1007/BF02417081>, 1886.
- 990 Kim, T., Hansen, A. M., and Branner, K.: Development of an anisotropic beam finite element for composite wind turbine blades in multibody system, *Renewable Energy*, 59, 172–183, <https://doi.org/https://doi.org/10.1016/j.renene.2013.03.033>, 2013.
- Kim, T., Larsen, T. J., and Yde, A.: Investigation of potential extreme load reduction for a two-bladed upwind turbine with partial pitch, *Wind Energy*, 18, 1403–1419, <https://doi.org/https://doi.org/10.1002/we.1766>, 2015.
- 995 Lazarus, A. and Thomas, O.: A harmonic-based method for computing the stability of periodic solutions of dynamical systems, *Comptes Rendus. Mécanique*, 338, 510–517, <https://doi.org/10.1016/j.crme.2010.07.020>, 2010.
- Leishman, J. G., Beddoes, T. S., and Ltd, W. H.: A Generalised Model for Airfoil Unsteady Aerodynamic Behaviour and Dynamic Stall Using the Indicial Method, <https://api.semanticscholar.org/CorpusID:126280624>, 1986.
- Madsen, H. A., Larsen, T. J., Pirrung, G. R., Li, A., and Zahle, F.: Implementation of the blade element momentum model on a polar grid and its aeroelastic load impact, *Wind Energy Science*, 5, 1–27, <https://doi.org/10.5194/wes-5-1-2020>, 2020.
- 1000 Meng, F., Lio, A., and Riva, R.: Reduced-order modelling of floating offshore wind turbine: Aero-hydro-elastic stability analysis, in: *The Science of Making Torque from Wind (TORQUE 2024): Offshore wind*, no. 6 in *Journal of Physics: Conference Series*, IOP Publishing, United Kingdom, <https://doi.org/10.1088/1742-6596/2767/6/062012>, 2024.
- Offshore Wind Scotland: Floating Wind in Scotland, <https://www.offshorewindscotland.org.uk/the-offshore-wind-market-in-scotland/floating-wind-in-scotland/>, 2024.
- 1005 Pamfil, B., Bredmose, H., and Kim, T.: Floating wind turbine stability and time response analysis with rotating modes, *Journal of Physics: Conference Series*, 2767, 022 057, <https://doi.org/10.1088/1742-6596/2767/2/022057>, 2024.
- Riva, R.: *Stability Analysis of Wind Turbines through System Identification Techniques*, Ph.D. thesis, Politecnico di Milano Department of Aerospace Science and Technology, 2017.
- 1010 Riva, R., Cacciola, S., and Bottasso, C. L.: Periodic stability analysis of wind turbines operating in turbulent wind conditions, *Wind Energy Science*, 1, 177–203, <https://doi.org/10.5194/wes-1-177-2016>, 2016.
- Skjoldan, P.: *Modal Dynamics of Wind Turbines with Anisotropic Rotors*, <https://doi.org/10.2514/6.2009-1036>, 2009.
- Skjoldan, P. and Hansen, M.: On the similarity of the Coleman and Lyapunov–Floquet transformations for modal analysis of bladed rotor structures, *Journal of Sound and Vibration*, 327, 424–439, <https://doi.org/https://doi.org/10.1016/j.jsv.2009.07.007>, 2009.
- 1015 Skjoldan, P. F.: *Aeroelastic modal dynamics of wind turbines including anisotropic effects*, Ph.D. thesis, Danmarks Tekniske Universitet, Risø Nationallaboratoriet for Bæredygtig Energi. Risø-PhD No. 66(EN), 2011.
- Stiesdal Offshore: Tetra Floating offshore foundations, <https://www.stiesdal.com/wp-content/uploads/2023/04/32514-Stiesdal-Offshore-brochure.pdf>, 2023.
- Xu, J. and Gasch, R.: Modale Behandlung linearer periodisch zeitvarianter Bewegungsgleichungen, *Archive of Applied Mechanics*, 65, 178–193, <https://doi.org/10.1007/BF00799297>, 1995.
- 1020 Øye, S.: Dynamic stall, simulated as a time lag of separation’, K.F. McAnulty (ed) *Proceedings of the 4th IEA Symposium on the Aerodynamics of Wind Turbines*, ETSU-N-118, 1991.
